1 Eye-head coordination and dynamic visual scanning as indicators of visuo-cognitive  
2 demands in driving simulator

3

4 Laura Mikula<sup>1</sup>, Sergio Mejía-Romero<sup>1</sup>, Romain Chaumillon<sup>1</sup>, Amigale Patoine<sup>1</sup>, Eduardo  
5 Lugo<sup>1</sup>, Delphine Bernardin<sup>1,2</sup>, Jocelyn Faubert<sup>1</sup>

6

7 <sup>1</sup>Faubert Laboratory, School of Optometry, Université de Montréal, Montréal, Québec,  
8 Canada

9 <sup>2</sup>Essilor International, Research and Development Department, Paris, France & Essilor  
10 Canada, Saint-Laurent, Canada

11

12 Short title: Reorganization of eye and head movements depending on visuo-cognitive  
13 demands while driving

14 Corresponding author

15 Laura Mikula

16 3744 rue Jean Brillant

17 H3T 1P1, Montréal, QC, Canada

18 [laura.mikula@umontreal.ca](mailto:laura.mikula@umontreal.ca)

## 19 **Abstract**

20       Driving is an everyday task involving a complex interaction between visual and  
21 cognitive processes. As such, an increase in the cognitive and/or visual demands can lead  
22 to a mental overload which can be detrimental for driving safety. Compiling evidence  
23 suggest that eye and head movements are relevant indicators of visuo-cognitive demands  
24 and attention allocation. This study aims to investigate the effects of visual degradation  
25 on eye-head coordination as well as visual scanning behavior during a highly demanding  
26 task in a driving simulator. A total of 21 emmetropic participants (21 to 34 years old)  
27 performed dual-task driving in which they were asked to maintain a constant speed on a  
28 highway while completing a visual search and detection task on a navigation device.  
29 Participants did the experiment with optimal vision and with contact lenses that  
30 introduced a visual perturbation (myopic defocus). The results indicate modifications of  
31 eye-head coordination and the dynamics of visual scanning in response to the visual  
32 perturbation induced. More specifically, the head was more involved in horizontal gaze  
33 shifts when the visual needs were not met. Furthermore, the evaluation of visual scanning  
34 dynamics, based on time-based entropy which measures the complexity and randomness  
35 of scanpaths, revealed that eye and gaze movements became less explorative and more  
36 stereotyped when vision was not optimal. These results provide evidence for a  
37 reorganization of both eye and head movements in response to increasing visual-  
38 cognitive demands during a driving task. Altogether, these findings suggest that eye and  
39 head movements can provide relevant information about visuo-cognitive demands  
40 associated with complex tasks. Ultimately, eye-head coordination and visual scanning

41 dynamics may be good candidates to estimate drivers' workload and better characterize  
42 risky driving behavior.

43 Keywords: eye-head coordination, transition entropy, driving, visuo-cognitive  
44 demands

45

## 46 **Introduction**

47 Vision is one of the most important sensory input used when driving [1], and as such  
48 intact visual processing and functions are a prerequisite for driver's license application.  
49 The most widespread vision assessment comprises measurements of visual acuity and the  
50 extent of visual field. However, not all drivers are subject to the same regulations since  
51 legal visual requirements for driving can vary between, and sometimes within, countries.  
52 For instance, the minimum visual acuity imposed in the United States ranges between  
53 20/40 and 20/100 depending on the jurisdiction [2], whereas Canadian vision standards  
54 are set to 20/50 except for the provinces of New Brunswick and Nova Scotia which require  
55 a minimum of 20/40, in accordance with the recommendation of the International Council  
56 of Ophthalmology [3,4].

57 Although focus has been primarily directed to the vision standards for driving, to date  
58 studies have shown relatively weak or inconsistent relationships between stationary  
59 visual acuity by itself and motor vehicle collision involvement [1,5–10]. Besides, the  
60 likelihood of road accidents is not increased in drivers with visual acuity less than 20/40  
61 compared to those with better vision [8,11]. Given the highly visual complexity of driving,

62 it is not surprising that visual acuity alone does not reflect all the capacities necessary to  
63 safely operate a motor vehicle.

64 In contrast, visual attention and cognitive functions appear to be better predictors of  
65 driver safety behavior. The Useful Field of View (UFOV) test for example, has been  
66 designed to evaluate visual speed processing and divided as well as selective attention.  
67 Previous research has revealed that the impaired performance on the UFOV observed in  
68 older adults is indeed related to greater crash risk [5,10,12–14] and poorer driving  
69 performance [15–17]. Similarly, it has been reported that diminished cognitive functions  
70 are associated with unsafe driving [18–20]. And more recently, perceptual-cognitive  
71 abilities measured using 3-Dimensional Multiple Object Tracking (3D-MOT) have been  
72 shown to predict the performance of older adults in driving simulator [21,22].

73 Therefore, driving is a cognitively demanding task that requires not only proper visual  
74 but also cognitive functions. As a result of the limited human brain capacity, the increased  
75 mental workload associated with multitasking results in impaired behavioral performance  
76 [23–25]. Distracted driving refers to any concurrent activity that can withdraw attention  
77 from the primary task of driving and includes but is not limited to eating, texting,  
78 interacting with passengers or using entertainment and navigation systems [26]. Indeed,  
79 about 21% of fatalities and 27% of serious injuries that happened in 2016 involved some  
80 form of distracted driving according to Transport Canada's National Collision Database.  
81 The use of in-vehicle devices has been shown to increase drivers' cognitive resources,  
82 resulting in a reduced ability to control their car [27–29]. Performing concurrent tasks

83 while driving is thus a major concern for road safety as it is likely to disrupt visual attention  
84 allocation [30–32].

85 The coupling between eye movements and attention has been well-documented,  
86 showing that attention is deployed to the location of a future saccade [33–35]. As a  
87 consequence of greater mental workload, the attentional resources available to visually  
88 explore the environment are drastically reduced. In the context of driving, it results in  
89 spatial gaze concentration as well as more frequent and longer fixations away from the  
90 road, which can affect the detection of potential hazards [36–39]. In addition to classical  
91 eye movement metrics, including fixation rate and duration, entropy has been derived  
92 from information theory [40] to provide a quantitative analysis of gaze behavior in  
93 naturalistic environments such as flight simulation [41–44], surgery [45–47] and driving  
94 [48–51]. The entropy captures visual scanning complexity and, by extension, the spatial  
95 distribution of visual attention using two measures. The stationary entropy characterizes  
96 the overall gaze dispersion across the visual scene whereas the transition entropy reflects  
97 the randomness (or the predictability) in the scanning pattern [52–54].

98 Previous research has shown decreased gaze entropy in pilots during high-complexity  
99 flights [42,44] and when performing a subsidiary task while driving [48]. Thus, increasing  
100 cognitive demands seem to be associated with lower entropy, which indicates less  
101 exploration and a more predictable pattern of visual scanning [54]. In contrast, more  
102 traditional eye metrics such as saccade amplitude and fixation duration were not found  
103 to be as sensitive to the modulation of mental workload in these situations. Furthermore,  
104 pilots' electroencephalographic (EEG) recordings revealed that the reduction of gaze

105 entropy induced by flight complexity is accompanied by enhanced frontal theta  
106 oscillations [41]. Interestingly, EEG frontal theta power is known to be a  
107 neurophysiological index of cognitive and attentional demands [55–58]. These results  
108 suggest that entropy measures reflect changes of the ocular behavior in response to the  
109 task workload. However, it should be noted that the calculation of transition entropy in  
110 the aforementioned studies relies on the spatial discretisation of the visual space and is  
111 therefore highly dependent on the visual content of the scene. This can be problematic  
112 in the case of dynamically changing stimuli that can modify fixation probabilities and thus  
113 entropy measures. An alternative method that has been put forward this limitation is to  
114 investigate eye movements over multiple temporal segments, instead of spatial areas of  
115 interest [59]. The benefit of this time-based entropy measure is that it is less sensitive to  
116 shifts of the visual scene in more naturalistic settings, where head and body movements  
117 occur.

118       When driving, as opposed to less naturalistic environments, head movements are  
119 likely to be involved [60]. Indeed, gaze shifts greater than 15° usually rely on a  
120 combination of both eye and head movements [61–64]. Moreover, it has been shown  
121 that the processing of visual stimuli is enhanced when presented in the straight-ahead  
122 direction, independently of gaze direction [65,66]. These results suggest that there is a  
123 relationship between visuospatial attention and head movements, as was described for  
124 eye movements. Using a driving simulator, different eye-head coordination dynamics  
125 have been recorded following exogenous (i.e., stimulus-driven) and endogenous (i.e.,  
126 goal-oriented) attention shifts [67]. Furthermore, progressive lens wearers have been

127 shown to modify their eye-head coordination in real-world driving [68] or when presented  
128 with driving-related scenes [69], providing evidence that eye-head movements are  
129 modulated by the quality of visual inputs. Altogether, these findings show that  
130 coordinated movements of the eyes and head are related to visuo-cognitive processing  
131 [70].

132 As stated above, driving is a complex activity and if the associated visuo-cognitive  
133 needs are not met, driver's safety can be compromised. The present study aims to  
134 investigate the effects of increasing visual and cognitive demands on eye-head  
135 coordination as well as visual scanning behavior in a driving simulator scenario. The  
136 driving task load was manipulated by introducing a concurrent visual search and detection  
137 task while visual demands were challenged by an experimental visual degradation  
138 induced by contact lens wear. The spatial distributions of eye-head movements were  
139 analyzed as well as the coordination between the eyes and the head. For this study, in  
140 contrast to traditional entropy measures which describe the spatial distribution of  
141 movements, entropy was computed based on temporal dynamics. Consequently, time-  
142 based entropy metrics were implemented for the gaze, but also the eyes and the head  
143 signals in order to better describe the changes in scanning behavior as a result of greater  
144 visuo-cognitive demands.

145

## 146 **Material and methods**

147 *Participants*

148 Twenty-one participants (15 males, 6 females) aged between 21 and 34 years old  
149 (mean  $\pm$  SD = 24.8  $\pm$  3.7) were recruited for this study. They all had a valid driver's license  
150 for at least 5 years and they had normal vision or corrected with contact lenses (i.e., far  
151 visual acuity of 4/10 or better in ETDRS chart, stereoscopic acuity of minimum 50 seconds  
152 of arc in Randot test and a visual field of at least 100 continuous degrees along the  
153 horizontal meridian and at least 10 continuous degrees above and 20 continuous degrees  
154 below fixation). Participants did not suffer from any visual, vestibular, neurological,  
155 musculoskeletal or cardiovascular impairment. In addition, scores on the UFOV test  
156 showed that all individuals were classified in the low or very-low risk groups for  
157 probability of driving difficulties. All participants provided informed written consent and  
158 received a compensation of 15\$ after the completion of the experiment. This study and  
159 all the experimental procedures were approved by the ethics committee of Université de  
160 Montréal (Comité d'éthique de la recherche clinique CERC; certificate N°18-090-CERES-  
161 D).

## 162 *Apparatus*

163 The Virage VS500M car driving simulator (Virage Simulation Inc.<sup>®</sup>, Montréal, Canada)  
164 was used for the driving tasks. The cockpit consisted of real car parts including a seat, a  
165 force feedback steering wheel, accelerator and brake pedals, a dashboard and automatic  
166 transmission and controls. The visualization system included a PC 5-channel image  
167 generator as well as three 50-inch high-resolution (1280 x 720 pixels) overhead projection  
168 screens providing 180° front views. In addition, two smaller lateral screens were  
169 positioned in the back to replicate blind spot and mirror visualization. Rearview and side



170 mirrors were projected on the central screen at their approximate locations in a real car.  
171 The driving cabin of the simulator was mounted on a three-axis platform with electric  
172 actuators that recreated the haptic feedback of acceleration, braking, engine-induced  
173 vibrations and road texture. A stereo sound system provided realistic engine and external  
174 road sounds, and Doppler effects were used to generate naturalistic sounds of  
175 surrounding traffic. All auditory information was adjusted to the driving speed. The  
176 navigation device consisted of an 8-inch LCD monitor (1024 x 768 pixels) which was  
177 located on the car center console, at the level of the air vents and approximately 70 cm  
178 away from participants' head.

179 Head movements were recorded using an OptiTrack motion capture system and the  
180 Motive software (NaturalPoint Inc., Oregon, USA) at a sampling rate of 120 Hz.  
181 Participants wore a helmet with 4 retro-reflective markers located above the head. The  
182 3D positions of the markers were recorded by a camera placed on top of the simulator's  
183 center screen, in order to track yaw, pitch and roll rotations of the head while participants  
184 were driving. Eye movements were recorded using SMI Eye Tracking Glasses 2 Wireless  
185 (SensoMotoric Instruments, Teltow, Germany) which provide native, binocular tracking  
186 with a sampling rate of 120 Hz. The infrared light emitted by the glasses allowed two  
187 cameras located in the lower frame to track the corneal reflections and determine the  
188 center of the pupils. Eye rotations were recorded in yaw and pitch.

#### 189 *Procedure*

190 In the driving scenario, participants were on a highway and the task consisted of  
191 maintaining their speed at 90 km/h, as accurately as possible. They were instructed to

192 drive normally, as they would in real life and respect road signs, speed limits and other  
193 road users. While driving, participants were asked to perform a visual search task on a  
194 navigation device located in periphery, on the center console. One trial of the visual  
195 search task proceeded as follows. The navigation device turned on and displayed a picture  
196 of direction road signs with multiple information (Figure 1.A) for 6 seconds and then the  
197 device was turned off. Participants had to verbally report the number associated with the  
198 city “Montréal” which appeared on each road signs among other directions. They were  
199 not given any cue to the onset of a given trial; however, no time limit was imposed and  
200 they were allowed to respond during and after the stimuli presentation. A total of 7 visual  
201 search trials were randomly distributed in time throughout the driving scenario, which  
202 lasted approximately 6 minutes and 30 seconds (Figure 1.B).

203 Each participant performed the experiment in two conditions: with normal or  
204 corrected-to-normal vision (Optimal vision) and with reduced visual acuity (Degraded  
205 vision). The order of both experimental conditions was counterbalanced across  
206 participants to control for practice effects. For the degraded vision condition, participants  
207 were divided into two different groups. In the “lower degradation” group, the contact  
208 lenses power was chosen so that participants’ visual acuity would approach 4/10 at 3 m  
209 distance whereas for the “higher degradation” group, the targeted visual acuity was still  
210 4/10 but at a distance of 1m<sup>20</sup>. Eleven out of the 21 participants (8 males, 3 females; age  
211 =  $24.2 \pm 3.5$  years old) were in the lower perturbation group and the remaining 10  
212 participants (7 males, 3 females; age =  $25.5 \pm 3.9$  years old) were in the higher  
213 perturbation group. Disposable soft contact lenses (CooperVision Inc.<sup>®</sup>) were used to

214 reduce participants' visual acuity. The power of contact lenses was defined by calculating  
215 the difference between the target threshold visual acuity and the visual acuity without  
216 correction of the participant.

217

218 **Figure 1. A.** Example of a direction road sign presented on the navigation device  
219 during the visual search task. Participants were asked to give the number associated with  
220 the city "Montréal" (here 76). **B.** Temporal sequence of the driving scenario. Driving  
221 speed, head rotation and eye rotation as a function of time. Grey shaded areas depict the  
222 7 visual search trials. Yaw rotations are represented in red and pitch rotations in blue.

223

224 *Variables*

225 Head rotations were recorded in the world coordinate system whereas eye rotations  
226 were measured in the head coordinate frame. In addition, gaze (eye-in-space) rotations  
227 were computed afterwards by using the head-in-space and the eye-in-head recorded  
228 signals. For the purpose of this study, yaw and pitch rotations were analyzed. Negative  
229 yaw angles indicate left and positive yaw angles indicate right. On the other hand,  
230 negative pitch angles correspond to downward rotations whereas positive pitch rotations  
231 describe upward rotations in the corresponding coordinate system.

232 Eye-head coordination was investigated by considering the linear regression of head  
233 versus eye rotations. If the eyes move without any head rotation, the slope would equal  
234 0. In contrast, the bigger the slope, the more involved the head is in coordinated eye-head

235 movements. In both visual conditions, linear regressions slopes were computed for each  
236 individual and then averaged across participants within the same degradation group. In  
237 order to exclude potential outliers and data artefacts from the regression analysis, data  
238 with low-density distribution (less than 20 occurrences per 1x1 degree bin) were  
239 removed. Eye-head coordination was analyzed only during the visual search trials,  
240 separately for yaw and pitch rotations.

241 In contrast to eye-head coordination, entropy was evaluated throughout the whole  
242 driving scenario, and not only during the visual search task. In order to evaluate time-  
243 based entropy, eye and gaze data were divided into time bins of 120 ms, which  
244 approximates the minimum fixation duration. Because head movements are slower, data  
245 were binned into 800 ms windows. Time-based transition entropy was then calculated by  
246 using the conditional entropy equation [71] as follows:

$$247 \quad Entropy = - \sum_{i=1}^n p_i \sum_{j=1}^n p(i,j) \log_2 p(i,j)$$

248 Where  $p_i$  is the probability that one fixation is found in time bin  $i$  and  $p(i,j)$  the probability  
249 to find the same fixation in time bins  $i$  and  $j$ . By analogy to traditional transition entropy,  
250 where  $p_i$  represents the probability that one fixation is in the area of interest  $i$  and  $p(i,j)$   
251 the probability to transition from area  $i$  to  $j$ . The entropy calculated was then normalized  
252 by the maximum entropy so that it ranged between 0 and 1. As supported by previous  
253 research, higher entropy depicts a more complex and less predictable pattern of visual  
254 scanning. On the other hand, lower entropy suggests a more structured and less random

255 pattern of scanning behavior [52–54]. All data processing and computations were  
256 performed using a custom-written Matlab® toolbox (The MathWorks, Natick, MA, USA).

257

### 258 *Statistical analyses*

259 In order to compare the distributions of eye, head and gaze rotations between  
260 optimal and degraded vision, two-sample Kolmogorov-Smirnov tests were used, where  
261 the null hypothesis assumes that the two samples come from the same continuous  
262 distribution. Two-way mixed ANOVAs were conducted to explore the effect of the visual  
263 condition (within-subjects factor – optimal and degraded vision) and the severity of the  
264 visual perturbation (between-subjects factor – lower and higher degradation groups).  
265 Non-normal data were corrected for distribution skew using the Box-Cox transformation  
266 [72]. Tukey’s HSD post-hoc tests were used to further explore significant main effects and  
267 interactions. Statistical threshold was set to 0.05.

268

## 269 **Results**

270 The density distributions of head, eye and gaze rotations during the visual search task  
271 are depicted in Figure 2. In optimal vision (Figure 2.A), most of the eye, gaze and head  
272 rotations in yaw and pitch were centered around the origin (yellow areas). These  
273 observations indicate that both the head and the gaze were primarily oriented towards  
274 the middle of the central driving simulator screen (i.e., the road ahead). In addition, it  
275 shows that the eyes were mostly in the primary position – in other words, the visual axis

276 is parallel to the sagittal plane of the head. Furthermore, the distributions of eye, head  
277 and gaze rotations appear to stretch out to the bottom right quadrant (blue green areas)  
278 which roughly corresponds to the position of the car center console. This demonstrates  
279 that participants were actually involved in the visual search task displayed on the  
280 navigation device located in periphery. Interestingly, the distributions of rotations  
281 seemed to be modified by the visual degradation induced by the contact lenses (Figure  
282 2.B). These differences are better captured through the kernel density estimates depicted  
283 in Figure 3. Two-sample Kolmogorov-Smirnov tests revealed that the distributions of  
284 rotations between the optimal and degraded vision conditions were significantly different  
285 for the eye and the gaze in pitch, and for the head in yaw (all  $p < 0.01$ ). Similar to the  
286 optimal vision condition; head, eye and gaze rotations in degraded vision were mostly  
287 aligned with the origin. This shows that, irrespective of the visual perturbation,  
288 participants tend to keep their head and eyes directed towards the road straight ahead  
289 while driving and performing the concurrent visual search task in periphery. However, as  
290 a result of the visual degradation, rotations around 0 were reduced and more rotations  
291 were observed around  $-12^\circ$  in pitch for the eyes (Figure 3.A),  $+20^\circ$  in yaw for the head  
292 (Figure 3.B) and  $-15^\circ$  in pitch for the gaze (Figure 3.C). These findings suggest that, in  
293 presence of the visual degradation, participants are more likely to direct their eyes and  
294 head towards the navigation device located on the car center console.

295

296 **Figure 2.** Density distributions of rotations in optimal vision (A) and degraded vision  
297 (B) during the visual search task. Pitch rotations are plotted as a function of yaw rotations

298 for the eye (left column), the head (middle column) and the gaze (right column). The color  
299 scale depicts the number of data points from all participants ( $n = 21$ ) for a given  
300 combination of yaw-pitch angles.

301

302 **Figure 3.** Kernel density estimates of eye (A), head (B) and gaze (C) yaw and pitch  
303 rotations depicted in Figure 2, in the optimal and degraded vision conditions.  $**p < 0.01$ ,  
304  $***p < 0.001$

305

306 The coordination between eye and head rotations was first analyzed in the yaw axis  
307 (Figure 4). In the optimal vision condition, the average slope of the linear regression  
308 between head yaw and eye yaw was  $-0.47 \pm 0.43$  for the lower degradation group and -  
309  $0.22 \pm 0.29$  for the higher degradation group. In the degraded vision condition, the slopes  
310 were  $-0.50 \pm 0.32$  and  $-0.66 \pm 0.43$  for the least and most impaired group, respectively. A  
311 two-way ANOVA revealed a significant main effect of the visual perturbation showing that  
312 the average linear regression slope was steeper in the degraded vision condition  
313 compared to the optimal vision condition ( $F(1,38) = 5.07$ ,  $p = 0.030$ ,  $\eta^2 = 0.11$ ). However,  
314 there was no significant main effect of the degradation group ( $F(1,38) = 0.25$ ,  $p = 0.617$ )  
315 and no significant interaction ( $F(1,38) = 2.98$ ,  $p = 0.092$ ). The eye-head coordination in the  
316 pitch axis is illustrated in Figure 5. When vision was optimal, the average slopes were very  
317 close to 0 for both degradation groups (lower degradation group:  $-0.01 \pm 0.09$  and higher  
318 degradation group:  $0.00 \pm 0.08$ ). In the degraded vision condition, the slope for the lower  
319 degradation group was  $-0.11 \pm 0.21$  and  $-0.07 \pm 0.24$  for the higher degradation group.

320 The two-way ANOVA conducted showed neither significant main effects of the visual  
321 degradation ( $F(1,38) = 2.73, p = 0.107$ ) and degradation severity ( $F(1,38) = 1.00, p = 0.323$ ),  
322 nor a significant interaction ( $F(1,38) = 0.28, p = 0.598$ ). These findings suggest that the  
323 eye-head coordination in yaw, but not in pitch, is modified in response to the visual  
324 degradation introduced. More specifically, when vision is not optimal, more head  
325 movements are recruited to perform the visual search task while driving. However, eye-  
326 head coordination does not seem to reveal differences between the two degradation  
327 groups.

328

329 **Figure 4.** Eye-head coordination in the yaw axis, in optimal (right column) and  
330 degraded vision (right column) for the lower degradation group (top row) and the higher  
331 degradation group (top row) during the visual search task. Head rotations are represented  
332 as a function of eye rotations (grey data points). Average slopes of the linear regression  
333 (red lines) are reported in each plot. Ellipses represent the joint probability distributions  
334 and colored lines correspond to iso-probability contours.

335

336 **Figure 5.** Eye-head coordination in the pitch axis, in optimal (right column) and  
337 degraded vision (right column) for the lower degradation group (top row) and the higher  
338 degradation group (top row) during the visual search task. Head rotations are represented  
339 as a function of eye rotations (grey data points). Average slopes of the linear regression  
340 (red lines) are reported in each plot. Ellipses represent the joint probability distributions  
341 and colored lines correspond to iso-probability contours.



342

343 In order to further explore the scanning behavior of participants, the time-based  
344 entropy was computed across the entire driving scenario and the resulting measures are  
345 presented in Table 1. Transition entropies for the eye, the head and the gaze are depicted  
346 in Figure 6. For the eye signal, the two-way ANOVA revealed a main effect of the visual  
347 condition ( $F(1,38) = 17.1, p < 0.001, \eta^2 = 0.29$ ) showing that eye entropy was significantly  
348 reduced in the presence of the visual perturbation, compared to the optimal vision  
349 condition. In contrast, no main effect of the degradation severity ( $F(1,38) = 3.28, p =$   
350  $0.078$ ) and no significant interaction ( $F(1,38) = 1.07, p = 0.307$ ) were reported. Analyses  
351 on the head entropy showed no significant main effects of the visual condition ( $F(1,38) =$   
352  $3.35, p = 0.075$ ) or the severity of the degradation ( $F(1,38) = 1.27, p = 0.267$ ) and no  
353 significant interaction ( $F(1,38) = 0.06, p = 0.816$ ). As for the gaze, the ANOVA revealed a  
354 significant main effect of the visual condition ( $F(1,38) = 6.78, p = 0.013, \eta^2 = 0.15$ ) where  
355 entropy was decreased when vision was degraded. However, no main effect of  
356 degradation severity ( $F(1,38) = 0.29, p = 0.593$ ) and no significant interaction ( $F(1,38) =$   
357  $0.05, p = 0.820$ ) were found. These results show that the scanning dynamics of both the  
358 eyes and the gaze are similarly affected by the visual perturbation induced.  
359

|                     | Optimal vision        |                       | Degraded vision       |                       |
|---------------------|-----------------------|-----------------------|-----------------------|-----------------------|
|                     | Lower degradation     | Higher degradation    | Lower degradation     | Higher degradation    |
| <b>Eye entropy</b>  | 0.477 ( $\pm 0.016$ ) | 0.470 ( $\pm 0.013$ ) | 0.448 ( $\pm 0.045$ ) | 0.422 ( $\pm 0.030$ ) |
| <b>Head entropy</b> | 0.397 ( $\pm 0.010$ ) | 0.394 ( $\pm 0.010$ ) | 0.392 ( $\pm 0.014$ ) | 0.388 ( $\pm 0.007$ ) |

|                     |                      |                      |                      |                      |
|---------------------|----------------------|----------------------|----------------------|----------------------|
| <b>Gaze entropy</b> | 0.476 ( $\pm$ 0.014) | 0.478 ( $\pm$ 0.018) | 0.449 ( $\pm$ 0.047) | 0.458 ( $\pm$ 0.027) |
|---------------------|----------------------|----------------------|----------------------|----------------------|

360

361 Table 1. Average ( $\pm$  standard deviation) entropy values calculated for the eye, the  
362 head and the gaze in optimal and degraded vision conditions, for both lower and higher  
363 degradation groups.

364

365 **Figure 6.** Entropy values computed for the eye, the head and the gaze as a function  
366 of the visual condition and the degradation group. The histograms represent the average  
367 entropy across participants. The error bars represent the SEM and the light grey circles  
368 depict the entropy for each individual. \* $p < 0.05$ , \*\*\* $p < 0.001$

369

## 370 Discussion

371 This study was designed to explore the effects of increasing visual and cognitive  
372 demands on eye-head movements and visual scanning pattern while driving. Participants  
373 in a driving simulator were asked to maintain constant speed and perform a concurrent  
374 visual search and detection task on a navigation device located in the periphery. A visual  
375 perturbation was experimentally induced by the wear of contact lenses. The distributions  
376 of eye and gaze movements in the pitch axis, and head movements in the yaw axis were  
377 found to be affected by the introduction of the visual degradation. Namely, rotations  
378 were modified in such a way that participants directed their eyes and head more towards  
379 the navigation device on the car center console, where the visual search task was

380 displayed. Nevertheless, in both the optimal and the degraded vision conditions, the head  
381 and the gaze were mostly directed on the road ahead as shown by the maxima of density  
382 estimates which were centered around 0°. These observations resemble the findings  
383 reporting that more gaze concentration towards the road center area as the driving task  
384 difficulty increases [38,73]. Furthermore, eye-in-head rotations revealed that the eyes  
385 remained somewhat aligned with the front head direction. This is consistent with  
386 previous studies that have shown that eye fixations are strongly biased towards the head  
387 orientation and that eye-head misalignments can result in impaired visual processing  
388 [70,74]. Taken together, these findings suggest that although our participants were  
389 performing a visual search in the periphery, their focus remained largely centered on the  
390 road in front of the car. One possible explanation could be that participants were able to  
391 complete the subsidiary task on the navigation device faster than the maximum 7-second  
392 window allowed and, then shifted their eyes and head back to the road for the main  
393 driving task. The examination of reaction times to the visual search task, which we did not  
394 measure in the present study, would have been helpful to confirm or refute this  
395 hypothesis.

396 The analysis of eye-head coordination showed that, participants exhibited head  
397 movements of greater amplitude in the horizontal plane (i.e., yaw angle), when wearing  
398 the contact lenses compared to when vision was optimal. Considering more specifically  
399 the degraded vision condition however, no significant difference was observed between  
400 the lower and higher degradation groups. Moreover, the eye-head coordination in the  
401 pitch axis was not significantly modified when vision was impaired by contact lens wear.

402 These results highlight the specific reorganization of horizontal eye-head movements in  
403 response to the visual degradation, while performing a subsidiary visual search task. Our  
404 results are in accordance with the observation that participants tend to make more head  
405 movements towards the visual stimuli of interest when task difficulty increases [75].  
406 Nevertheless, the slope of the linear regression of head versus eye rotations never  
407 exceeded -1. This implies that overall, the eyes contribute more than the head to gaze  
408 shifts, as previously described for the discrimination of visual targets in the periphery [76].  
409 Interestingly, the change in eye-head strategy highlighted in the present study echoes  
410 earlier work that has reported more and larger vertical head movements in participants  
411 adapting to progressive addition lenses [69,77]. This is attributed to the gradual change  
412 in power from the top to the bottom of progressive lenses, necessary to provide clear  
413 vision at all distances. In our study, however, horizontal movements were more likely to  
414 be involved as the secondary visual search task was displayed on the car center console.  
415 That would explain why our visual perturbation specifically affected the eye-head  
416 coordination across the horizontal, and not the vertical, plane.

417 The present study sought to investigate drivers' scanning behavior by means of the  
418 entropy. We adopted a new approach which takes into consideration the temporal rather  
419 than the standard spatial features of eye and head movements, which are typically used  
420 for the calculation of entropy. Our modified entropy measures revealed that the scanning  
421 pattern of the head was not strongly affected by the visual perturbation induced by the  
422 contact lenses. This difference may be due to slower head movements compared to the  
423 eyes, thus requiring the use of longer time windows for the calculation of time-based

424 head entropy. However, for the sake of this study we decided to use the same time  
425 window of 120 ms for the eyes, the gaze and the head in order to compare entropy  
426 measures between all three effectors. On the other hand, both eye and gaze entropies  
427 were found to be significantly decreased when vision was impaired, compared to when it  
428 was optimal. However, similar to eye-head coordination, the entropy of the eye and the  
429 gaze did not differ between the least and the most impaired groups. Reduced eye and  
430 gaze entropies while wearing contact lenses demonstrate that increasing visual demands  
431 altered drivers' visual scanning pattern, which became less explorative and more  
432 stereotyped. These results are similar to those reporting a reduction in gaze transition  
433 entropy when portions of visual stimuli are blurred [78]. Unfortunately, the authors did  
434 not discuss this result and it remains unclear why and how a visual perturbation can  
435 influence scanning patterns. Two non-mutually exclusive explanations can be advanced.  
436 The first is that transition entropy is dependent on the visual scene complexity, as  
437 suggested by Shiferaw and colleagues [54]. In that case, the loss of high spatial frequency  
438 content due to the blur induced by the contact lenses would result in reduced visual  
439 complexity and thus, in lower transition entropy. The second is that non-optimal vision  
440 substantially increases the overall cognitive task load. There again, a reduction in  
441 transition entropy is expected as it has been shown to decrease during high-complexity  
442 flights, complex pattern recognition tasks or dual-task driving [41,42,44,48,79]. Transition  
443 entropy is considered to be an indicator of visual scanning efficiency and to reflect the  
444 top-down modulation of gaze control [54]. As a consequence, the reduction in transition

445 entropy related to task difficulty or distraction is likely to demonstrate impaired allocation  
446 of resources for gaze control, due to overall greater cognitive demands.

447 Ultimately, our present findings demonstrate that the calculation of entropy based  
448 on temporal characteristics of the scanpath provides some advantages over the more  
449 traditional entropy measures considering spatial distribution. Indeed, transition entropy  
450 as commonly used to characterize scanning patterns quantifies the transition of fixations  
451 between different areas of interest that divide the visual scene [52,53,80]. However,  
452 under normal viewing conditions, eye movements are for the most part stimulus-driven  
453 and attracted to salient elements of the environment [81–83]. This thus suggests that  
454 transition entropy, assessed using regions of interest, might be highly dependent upon  
455 the visual scene composition and how the visual space is been discretized [54]. Under  
456 those circumstances, it makes it difficult to compare transition entropies between  
457 paradigms in which visual stimuli are more dynamic and change over time, such as in  
458 driving simulator. Furthermore, it has been acknowledged that fixation durations are also  
459 relevant to describe scanning patterns and can vary as a function of task difficulty [84,85].  
460 Hence, the use of time-based entropies would allow to minimize the confounding effects  
461 of various visuospatial task demands [59]. Our modified measures of entropy have been  
462 shown to vary in the same way as traditional transition entropy does in aviation and  
463 driving [41,42,48], therefore providing evidence that this particular method constitutes a  
464 valid approach to quantify visual scanning behavior in complex environments. In addition,  
465 transition entropy so far has been derived from gaze shifts which combine eye and head  
466 signals and to our knowledge, this is the first study to examine the entropy related to eyes

467 and head, separately. These findings suggest that transition entropy can be applied to eye  
468 and head recordings as well and, this would allow a better understanding of the  
469 relationship between eye and head scanning behaviors and strategies. Although further  
470 research is needed to strengthen the present findings, this is of particular interest for  
471 studies using more naturalistic or real-world settings in which the head is not restrained.

472 In this study, we introduced a blur in emmetropic participants in order to challenge  
473 their visual system and increase the visuo-cognitive demands of the task. For this purpose,  
474 they wore contact lenses with a positive addition which impose myopic defocus, thus  
475 resulting in a reduction of visual acuity. As a result of the lenses power, a change in  
476 accommodative demand occurred leading to a mismatch between the vergence and the  
477 accommodative responses, referred to as vergence-accommodation conflict. Although  
478 young adults have sufficient accommodative reserve to partially compensate for this  
479 mismatch [86–88], vergence-accommodation conflict has been shown to interfere with  
480 cognitive executive functions [89]. It is speculated that the neural correlates between  
481 cognitive control and the vergence-accommodation coupling partially overlap at the level  
482 of the frontal and parietal lobes. Consequently, both processes compete for visual  
483 attention resources when disrupting the balance between vergence and accommodation.  
484 This underscores the importance of the quality of vision during highly demanding  
485 cognitive tasks, such as driving for example. That said, it would be interesting to test older  
486 adults in order to investigate whether the decline of the accommodative ability  
487 exacerbate the effect of the visual degradation on their eye-head coordination and visual  
488 scanning behavior while driving. Finally, it has been reported that the visual system can

489 better handle changes in accommodative than in vergence demand [86,90]. This could  
490 account for why we did not observe significant differences between the lower and the  
491 higher visual degradation groups in our study. It is likely that participants were able to  
492 somewhat compensate, even for stronger addition and that would explain why we found  
493 no effect of the severity of visual degradation. This presumes that the modulation of the  
494 vergence response, such as prism-induced disparity for example, would have a greater  
495 impact on the visual system and would potentially allow to reveal distinct effects as a  
496 function of the extent of the visual perturbation.

497

## 498 **Conclusions**

499 To conclude, this study has provided evidence that when performing a highly  
500 demanding driving task, drivers adapt their eye-head coordination in order to meet the  
501 increasing visual demands related to vision degradation. By contrast, the overall spatial  
502 distribution of eye and head movements appears to be rather insensitive to perturbations  
503 of the visual input. Lastly, time-based transition entropy measures have revealed that the  
504 scanning behavior of the eyes and the gaze is modified by the visual perturbation induced.  
505 This modification in transition entropy suggests a decline in visual scanning efficiency in  
506 response to increased visuo-cognitive demands, which can be potentially detrimental for  
507 drivers' safety on the road. These findings demonstrate that quantitative measures of  
508 visual scanning provide relevant information about the visuo-cognitive demands and  
509 possibly the mental workload involved in performing complex tasks such as driving. If so,



510 time-based entropy could be used in upcoming research to help better identify distraction  
511 in fields where traditional entropy measures are currently being used, such as driving,  
512 aviation or surgery. Ultimately, dynamic visual scanning assessed through time-based  
513 entropy might be able to discriminate between safe and unsafe behaviors during these  
514 complex and demanding tasks.

515

## 516 **References**

- 517 1. Owsley C, McGwin G. Vision and driving. *Vision Res.* 2010 Nov 23;50(23):2348–61.
- 518 2. Casson EJ, Racette L. Vision standards for driving in Canada and the United States. A  
519 review for the Canadian Ophthalmological Society. *Can J Ophthalmol J Can*  
520 *Ophtalmol.* 2000 Jun;35(4):192–203.
- 521 3. International Council of Ophthalmology. Vision Requirements for Driving Safety. In  
522 Sao Paulo, Brazil; 2006.
- 523 4. Yazdan-Ashoori P, ten Hove M. Vision and driving: Canada. *J Neuro-Ophthalmol Off*  
524 *J North Am Neuro-Ophthalmol Soc.* 2010 Jun;30(2):177–85.
- 525 5. Cross JM, McGwin G, Rubin GS, Ball K, West SK, Roenker DL, et al. Visual and medical  
526 risk factors for motor vehicle collision involvement among older drivers. *Br J*  
527 *Ophthalmol.* 2009 Mar;93(3):400–4.
- 528 6. Decina LE, Staplin L. Retrospective evaluation of alternative vision screening criteria  
529 for older and younger drivers. *Accid Anal Prev.* 1993 Jun 1;25(3):267–75.

- 530 7. Desapriya E, Harjee R, Brubacher J, Chan H, Hewapathirane DS, Subzwari S, et al.  
531 Vision screening of older drivers for preventing road traffic injuries and fatalities.  
532 Cochrane Database Syst Rev. 2014 Feb 21;(2):CD006252.
- 533 8. Gresset JA, Meyer FM. Risk of accidents among elderly car drivers with visual acuity  
534 equal to 6/12 or 6/15 and lack of binocular vision. Ophthalmic Physiol Opt J Br Coll  
535 Ophthalmic Opt Optom. 1994 Jan;14(1):33–7.
- 536 9. Owsley C, McGwin G, Ball K. Vision impairment, eye disease, and injurious motor  
537 vehicle crashes in the elderly. Ophthalmic Epidemiol. 1998 Jun;5(2):101–13.
- 538 10. Rubin GS, Ng ESW, Bandeen-Roche K, Keyl PM, Freeman EE, West SK. A prospective,  
539 population-based study of the role of visual impairment in motor vehicle crashes  
540 among older drivers: the SEE study. Invest Ophthalmol Vis Sci. 2007 Apr;48(4):1483–  
541 91.
- 542 11. Keeffe JE, Jin CF, Weih LM, McCarty CA, Taylor HR. Vision impairment and older  
543 drivers: who’s driving? Br J Ophthalmol. 2002 Oct;86(10):1118–21.
- 544 12. Ball K, Owsley C, Sloane ME, Roenker DL, Bruni JR. Visual attention problems as a  
545 predictor of vehicle crashes in older drivers. Invest Ophthalmol Vis Sci. 1993  
546 Oct;34(11):3110–23.
- 547 13. Ball K, Roenker DL, Wadley VG, Edwards JD, Roth DL, McGwin G, et al. Can high-risk  
548 older drivers be identified through performance-based measures in a Department  
549 of Motor Vehicles setting? J Am Geriatr Soc. 2006 Jan;54(1):77–84.
- 550 14. Owsley C, Ball K, Sloane ME, Roenker DL, Bruni JR. Visual/cognitive correlates of  
551 vehicle accidents in older drivers. Psychol Aging. 1991 Sep;6(3):403–15.

- 552 15. Clay OJ, Wadley VG, Edwards JD, Roth DL, Roenker DL, Ball K. Cumulative meta-  
553 analysis of the relationship between useful field of view and driving performance in  
554 older adults: current and future implications. *Optom Vis Sci Off Publ Am Acad*  
555 *Optom*. 2005 Aug;82(8):724–31.
- 556 16. Myers RS, Ball KK, Kalina TD, Roth DL, Goode KT. Relation of useful field of view and  
557 other screening tests to on-road driving performance. *Percept Mot Skills*. 2000  
558 Aug;91(1):279–90.
- 559 17. Wood JM, Chaparro A, Lacherez P, Hickson L. Useful field of view predicts driving in  
560 the presence of distracters. *Optom Vis Sci Off Publ Am Acad Optom*. 2012  
561 Apr;89(4):373–81.
- 562 18. Emerson JL, Johnson AM, Dawson JD, Uc EY, Anderson SW, Rizzo M. Predictors of  
563 driving outcomes in advancing age. *Psychol Aging*. 2012 Sep;27(3):550–9.
- 564 19. Hollis AM, Duncanson H, Kapust LR, Xi PM, O’Connor MG. Validity of the mini-mental  
565 state examination and the montreal cognitive assessment in the prediction of driving  
566 test outcome. *J Am Geriatr Soc*. 2015 May;63(5):988–92.
- 567 20. Lee JA, Choi H, Kim D-A, Lee B-S, Lee JJ, Bae JH, et al. Relationship Between Cognitive  
568 Perceptual Abilities and Accident and Penalty Histories Among Elderly Korean  
569 Drivers. *Ann Rehabil Med*. 2016 Dec;40(6):1092–9.
- 570 21. Michaels J, Chaumillon R, Nguyen-Tri D, Watanabe D, Hirsch P, Bellavance F, et al.  
571 Driving simulator scenarios and measures to faithfully evaluate risky driving  
572 behavior: A comparative study of different driver age groups. *PloS One*.  
573 2017;12(10):e0185909.

- 574 22. Woods-Fry H, Deut S, Collin CA, Gagnon S, Faubert J, Bédard M, et al. Three-  
575 Dimensional Multiple Object Tracking Speed Thresholds are Associated with  
576 Measures of Simulated Driving Performance in Older Drivers: Proc Hum Factors  
577 Ergon Soc Annu Meet [Internet]. 2017 Sep 28 [cited 2020 Mar 21]; Available from:  
578 <https://journals.sagepub.com/doi/10.1177/1541931213601505>
- 579 23. Pashler H. Dual-task interference in simple tasks: data and theory. Psychol Bull. 1994  
580 Sep;116(2):220–44.
- 581 24. Salvucci DD, Taatgen NA. Threaded cognition: an integrated theory of concurrent  
582 multitasking. Psychol Rev. 2008 Jan;115(1):101–30.
- 583 25. Strayer DL, Cooper JM, Goethe RM, McCarty MM, Getty DJ, Biondi F. Assessing the  
584 visual and cognitive demands of in-vehicle information systems. Cogn Res Princ  
585 Implic. 2019 Jun 21;4(1):18.
- 586 26. Canadian Council of Motor Transport Administrators. Distracted Driving White  
587 Paper. 2018 Jun.
- 588 27. Blaschke C, Breyer F, Färber B, Freyer J, Limbacher R. Driver distraction based lane-  
589 keeping assistance. Transp Res Part F Traffic Psychol Behav. 2009 Jul 1;12(4):288–  
590 99.
- 591 28. Dewing WL, Johnson SM, Stackhouse SP. The interaction of non-driving tasks with  
592 driving. Minnesota, Department of Transportation; 1995.
- 593 29. Lansdown TC, Brook-Carter N, Kersloot T. Distraction from multiple in-vehicle  
594 secondary tasks: vehicle performance and mental workload implications.  
595 Ergonomics. 2004 Jan 15;47(1):91–104.

- 596 30. Lee Y-C, Lee JD, Ng Boyle L. The Interaction of Cognitive Load and Attention-Directing  
597 Cues in Driving. *Hum Factors*. 2009 Jun 1;51(3):271–80.
- 598 31. Mackenzie AK, Harris JM. A link between attentional function, effective eye  
599 movements, and driving ability. *J Exp Psychol Hum Percept Perform*.  
600 2017;43(2):381–94.
- 601 32. Strayer DL, Drews FA, Johnston WA. Cell phone-induced failures of visual attention  
602 during simulated driving. *J Exp Psychol Appl*. 2003;9(1):23–32.
- 603 33. Corbetta M, Akbudak E, Conturo TE, Snyder AZ, Ollinger JM, Drury HA, et al. A  
604 common network of functional areas for attention and eye movements. *Neuron*.  
605 1998 Oct;21(4):761–73.
- 606 34. Deubel H, Schneider WX. Saccade target selection and object recognition: evidence  
607 for a common attentional mechanism. *Vision Res*. 1996 Jun;36(12):1827–37.
- 608 35. Rizzolatti G, Riggio L, Dascola I, Umiltá C. Reorienting attention across the horizontal  
609 and vertical meridians: evidence in favor of a premotor theory of attention.  
610 *Neuropsychologia*. 1987;25(1A):31–40.
- 611 36. Mackenzie AK, Harris JM. Eye movements and hazard perception in active and  
612 passive driving. *Vis Cogn*. 2015 Jul 3;23(6):736–57.
- 613 37. Recarte MA, Nunes LM. Mental workload while driving: Effects on visual search,  
614 discrimination, and decision making. *J Exp Psychol Appl*. 2003;9(2):119–37.
- 615 38. Victor TW, Harbluk JL, Engström JA. Sensitivity of eye-movement measures to in-  
616 vehicle task difficulty. *Transp Res Part F Traffic Psychol Behav*. 2005 Mar 1;8(2):167–  
617 90.

- 618 39. Wang Y, Reimer B, Dobres J, Mehler B. The sensitivity of different methodologies for  
619 characterizing drivers' gaze concentration under increased cognitive demand.  
620 *Transp Res Part F Traffic Psychol Behav*. 2014 Sep 1;26:227–37.
- 621 40. Shannon CE. A mathematical theory of communication. *Bell Syst Tech J*. 1948  
622 Jul;27(3):379–423.
- 623 41. Diaz-Piedra C, Rieiro H, Cherino A, Fuentes LJ, Catena A, Di Stasi LL. The effects of  
624 flight complexity on gaze entropy: An experimental study with fighter pilots. *Appl*  
625 *Ergon*. 2019 May 1;77(1):92–9.
- 626 42. Harris RL, Tole JR, Ephrath AR, Stephens AT. How a New Instrument Affects Pilots'  
627 Mental Workload: *Proc Hum Factors Soc Annu Meet*. 1982;26:1010–3.
- 628 43. Harris RL, Glover BJ, Spady AA. Analytical Techniques of Pilot Scanning Behavior and  
629 Their Application [Internet]. NASA Langley Research Center, Hampton, VA, US; 1986  
630 [cited 2020 Mar 27]. Report No.: NASA TP-2525. Available from:  
631 <https://ntrs.nasa.gov/search.jsp?R=19860018448>
- 632 44. Tole JR, Stephens AT, Vivaudou M, Harris RL, Ephrath AR. Entropy, instrument scan  
633 and pilot workload. In *IEEE*, New York, NY, USA; 1982 [cited 2020 Mar 27]. Available  
634 from: <https://ntrs.nasa.gov/search.jsp?R=19830011205>
- 635 45. Di Stasi LL, Diaz-Piedra C, Rieiro H, Sánchez Carrión JM, Martin Berrido M, Olivares  
636 G, et al. Gaze entropy reflects surgical task load. *Surg Endosc*. 2016;30(11):5034–43.
- 637 46. Di Stasi LL, Díaz-Piedra C, Ruiz-Rabelo JF, Rieiro H, Sanchez Carrion JM, Catena A.  
638 Quantifying the cognitive cost of laparo-endoscopic single-site surgeries: Gaze-  
639 based indices. *Appl Ergon*. 2017 Nov 1;65:168–74.

- 640 47. Diaz-Piedra C, Sanchez-Carrion JM, Rieiro H, Stasi LLD. Gaze-based Technology as a  
641 Tool for Surgical Skills Assessment and Training in Urology. *Urology*. 2017 Sep  
642 1;107:26–30.
- 643 48. Schieber F, Gilland J. Visual Entropy Metric Reveals Differences in Drivers' Eye Gaze  
644 Complexity across Variations in Age and Subsidiary Task Load: Proc Hum Factors  
645 Ergon Soc Annu Meet [Internet]. 2008 Sep 1 [cited 2020 Jan 14]; Available from:  
646 <https://journals.sagepub.com/doi/10.1177/154193120805202311>
- 647 49. Shiferaw BA, Downey LA, Westlake J, Stevens B, Rajaratnam SMW, Berlowitz DJ, et  
648 al. Stationary gaze entropy predicts lane departure events in sleep-deprived drivers.  
649 *Sci Rep*. 2018 Feb 2;8(1):1–10.
- 650 50. Shiferaw BA, Crewther DP, Downey LA. Gaze entropy measures detect alcohol-  
651 induced driver impairment. *Drug Alcohol Depend*. 2019 Nov 1;204:107519.
- 652 51. Wang Y, Bao S, Du W, Ye Z, Sayer JR. Examining drivers' eye glance patterns during  
653 distracted driving: Insights from scanning randomness and glance transition matrix.  
654 *J Safety Res*. 2017 Dec 1;63:149–55.
- 655 52. Krejtz K, Duchowski A, Szmids T, Krejtz I, González Perilli F, Pires A, et al. Gaze  
656 Transition Entropy. *ACM Trans Appl Percept TAP*. 2015 Dec 10;13(1):4:1–4:20.
- 657 53. Krejtz K, Szmids T, Duchowski AT, Krejtz I. Entropy-based statistical analysis of eye  
658 movement transitions. In: *Proceedings of the Symposium on Eye Tracking Research  
659 and Applications* [Internet]. Safety Harbor, Florida: Association for Computing  
660 Machinery; 2014 [cited 2020 Mar 28]. p. 159–166. (ETRA '14). Available from:  
661 <https://doi.org/10.1145/2578153.2578176>

- 662 54. Shiferaw BA, Downey LA, Crewther DP. A review of gaze entropy as a measure of  
663 visual scanning efficiency. *Neurosci Biobehav Rev.* 2019;96:353–66.
- 664 55. Borghini G, Astolfi L, Vecchiato G, Mattia D, Babiloni F. Measuring neurophysiological  
665 signals in aircraft pilots and car drivers for the assessment of mental workload,  
666 fatigue and drowsiness. *Neurosci Biobehav Rev.* 2014 Jul;44:58–75.
- 667 56. Di Stasi LL, Diaz-Piedra C, Suárez J, McCamy MB, Martinez-Conde S, Roca-Dorda J, et  
668 al. Task complexity modulates pilot electroencephalographic activity during real  
669 flights. *Psychophysiology.* 2015;52(7):951–6.
- 670 57. Lin C-T, Chen S-A, Chiu T-T, Lin H-Z, Ko L-W. Spatial and temporal EEG dynamics of  
671 dual-task driving performance. *J NeuroEngineering Rehabil.* 2011 Feb 18;8:11.
- 672 58. Wang Y-K, Jung T-P, Lin C-T. Theta and Alpha Oscillations in Attentional Interaction  
673 during Distracted Driving. *Front Behav Neurosci.* 2018;12:3.
- 674 59. Grindinger T, Duchowski AT, Sawyer M. Group-wise similarity and classification of  
675 aggregate scanpaths. In: *Proceedings of the 2010 Symposium on Eye-Tracking  
676 Research & Applications [Internet]. Austin, Texas: Association for Computing  
677 Machinery; 2010 [cited 2020 May 10]. p. 101–104. (ETRA '10). Available from:  
678 <https://doi.org/10.1145/1743666.1743691>*
- 679 60. Land MF. Predictable eye-head coordination during driving. *Nature.* 1992 Sep  
680 24;359(6393):318–20.
- 681 61. Bartz AE. Eye and head movements in peripheral vision: nature of compensatory eye  
682 movements. *Science.* 1966 Jun 17;152(3729):1644–5.
- 683 62. Fuller JH. Head movement propensity. *Exp Brain Res.* 1992;92(1):152–64.



- 684 63. Pelz J, Hayhoe M, Loeber R. The coordination of eye, head, and hand movements in  
685 a natural task. *Exp Brain Res*. 2001 Aug;139(3):266–77.
- 686 64. Stahl JS. Amplitude of human head movements associated with horizontal saccades.  
687 *Exp Brain Res*. 1999 May;126(1):41–54.
- 688 65. Cicchini GM, Valsecchi M, De’Sperati C. Head movements modulate visual  
689 responsiveness in the absence of gaze shifts. *Neuroreport*. 2008 May 28;19(8):831–  
690 4.
- 691 66. Durand J-B, Camors D, Trotter Y, Celebrini S. Privileged visual processing of the  
692 straight-ahead direction in humans. *J Vis*. 2012 Jun 26;12(6).
- 693 67. Doshi A, Trivedi MM. Head and eye gaze dynamics during visual attention shifts in  
694 complex environments. *J Vis*. 2012 Feb 9;12(2).
- 695 68. Rifai K, Wahl S. Specific eye-head coordination enhances vision in progressive lens  
696 wearers. *J Vis*. 2016 01;16(11):5.
- 697 69. Chu BS, Wood JM, Collins MJ. Influence of presbyopic corrections on driving-related  
698 eye and head movements. *Optom Vis Sci Off Publ Am Acad Optom*. 2009  
699 Nov;86(11):E1267-1275.
- 700 70. Fang Y, Nakashima R, Matsumiya K, Kuriki I, Shioiri S. Eye-head coordination for  
701 visual cognitive processing. *PLoS One*. 2015;10(3):e0121035.
- 702 71. Ciuperca G, Girardin V. On the estimation of the entropy rate of finite Markov chains.  
703 In 2005.
- 704 72. Box GEP, Cox DR. An Analysis of Transformations. *J R Stat Soc Ser B Methodol*.  
705 1964;26(2):211–52.

- 706 73. Engström J, Johansson E, Östlund J. Effects of visual and cognitive load in real and  
707 simulated motorway driving. *Transp Res Part F Traffic Psychol Behav*. 2005 Mar  
708 1;8(2):97–120.
- 709 74. Nakashima R, Shioiri S. Why do we move our head to look at an object in our  
710 peripheral region? Lateral viewing interferes with attentive search. *PloS One*.  
711 2014;9(3):e92284.
- 712 75. Dunham DN. Cognitive difficulty of a peripherally presented visual task affects head  
713 movements during gaze displacement. *Int J Psychophysiol Off J Int Organ*  
714 *Psychophysiol*. 1997 Dec;27(3):171–82.
- 715 76. Schwab S, Würmle O, Altorfer A. Analysis of eye and head coordination in a visual  
716 peripheral recognition task. *J Eye Mov Res [Internet]*. 2012 Dec 15 [cited 2020 Apr  
717 26];5(2). Available from: <https://bop.unibe.ch/index.php/JEMR/article/view/2330>
- 718 77. Hutchings N, Irving EL, Jung N, Dowling LM, Wells KA, Lillakas L. Eye and head  
719 movement alterations in naïve progressive addition lens wearers. *Ophthalmic*  
720 *Physiol Opt J Br Coll Ophthalmic Opt Optom*. 2007 Mar;27(2):142–53.
- 721 78. Ryu D, Mann DL, Abernethy B, Poolton JM. Gaze-contingent training enhances  
722 perceptual skill acquisition. *J Vis*. 2016;16(2).
- 723 79. Raptis GE, Fidas CA, Avouris NM. On Implicit Elicitation of Cognitive Strategies using  
724 Gaze Transition Entropies in Pattern Recognition Tasks. In: *Proceedings of the 2017*  
725 *CHI Conference Extended Abstracts on Human Factors in Computing Systems*  
726 [Internet]. Denver, Colorado, USA: Association for Computing Machinery; 2017

- 727 [cited 2020 Apr 1]. p. 1993–2000. (CHI EA '17). Available from:  
728 <https://doi.org/10.1145/3027063.3053106>
- 729 80. Ellis SR, Stark L. Statistical dependency in visual scanning. *Hum Factors*. 1986  
730 Aug;28(4):421–38.
- 731 81. Antes JR. The time course of picture viewing. *J Exp Psychol*. 1974;103(1):62–70.
- 732 82. Mackworth NH, Morandi AJ. The gaze selects informative details within pictures.  
733 *Percept Psychophys*. 1967 Nov 1;2(11):547–52.
- 734 83. Parkhurst D, Law K, Niebur E. Modeling the role of salience in the allocation of overt  
735 visual attention. *Vision Res*. 2002 Jan 1;42(1):107–23.
- 736 84. Henderson JM, Graham PL. Eye movements during scene viewing: evidence for  
737 mixed control of fixation durations. *Psychon Bull Rev*. 2008 Jun;15(3):566–73.
- 738 85. Rayner K. Eye movements in reading and information processing: 20 years of  
739 research. *Psychol Bull*. 1998 Nov;124(3):372–422.
- 740 86. Bharadwaj SR, Candy TR. Accommodative and vergence responses to conflicting blur  
741 and disparity stimuli during development. *J Vis*. 2009 Oct 5;9(11):4.1-18.
- 742 87. Fincham EF, Walton J. The reciprocal actions of accommodation and convergence. *J*  
743 *Physiol*. 1957 Aug 6;137(3):488–508.
- 744 88. Morgan MW. Accommodation and vergence. *Optom Vis Sci*. 1968 Jul;45(7):417–454.
- 745 89. Daniel F, Kapoula Z. Induced vergence-accommodation conflict reduces cognitive  
746 performance in the Stroop test. *Sci Rep*. 2019 04;9(1):1247.

747 90. Horwood AM, Riddell PM. Developmental changes in the balance of disparity, blur,  
748 and looming/proximity cues to drive ocular alignment and focus. *Perception*.  
749 2013;42(7):693–715.

750

D 11

A

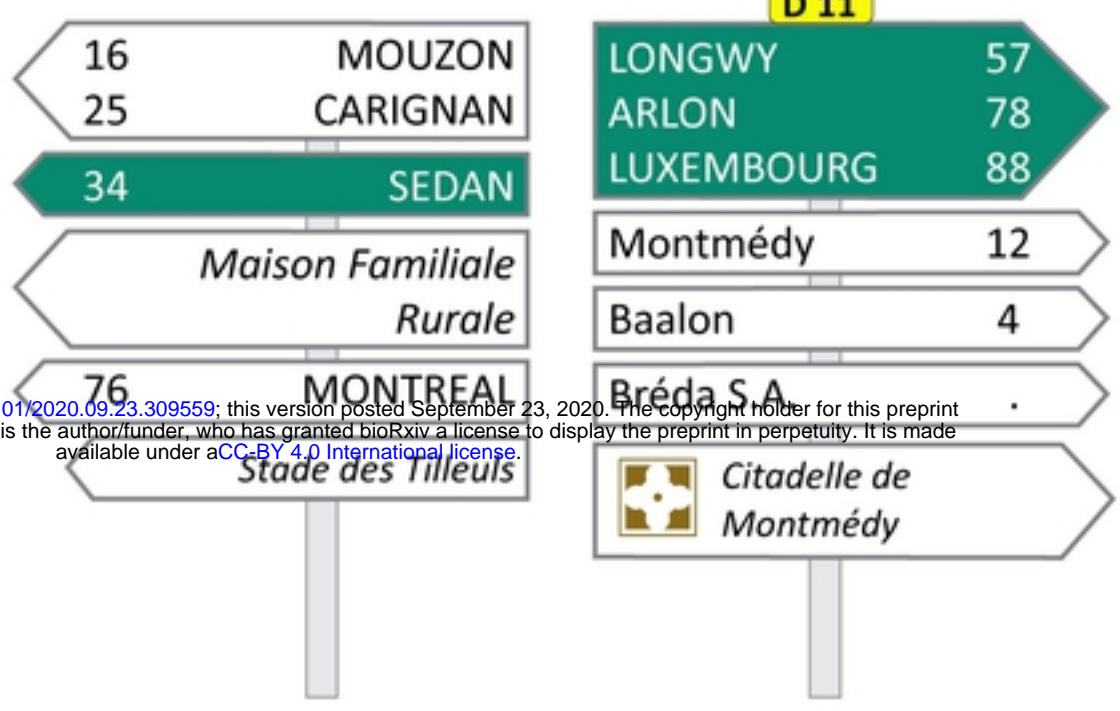

bioRxiv preprint doi: <https://doi.org/10.1101/2020.09.23.309559>; this version posted September 23, 2020. The copyright holder for this preprint (which was not certified by peer review) is the author/funder, who has granted bioRxiv a license to display the preprint in perpetuity. It is made available under aCC-BY 4.0 International license.

B

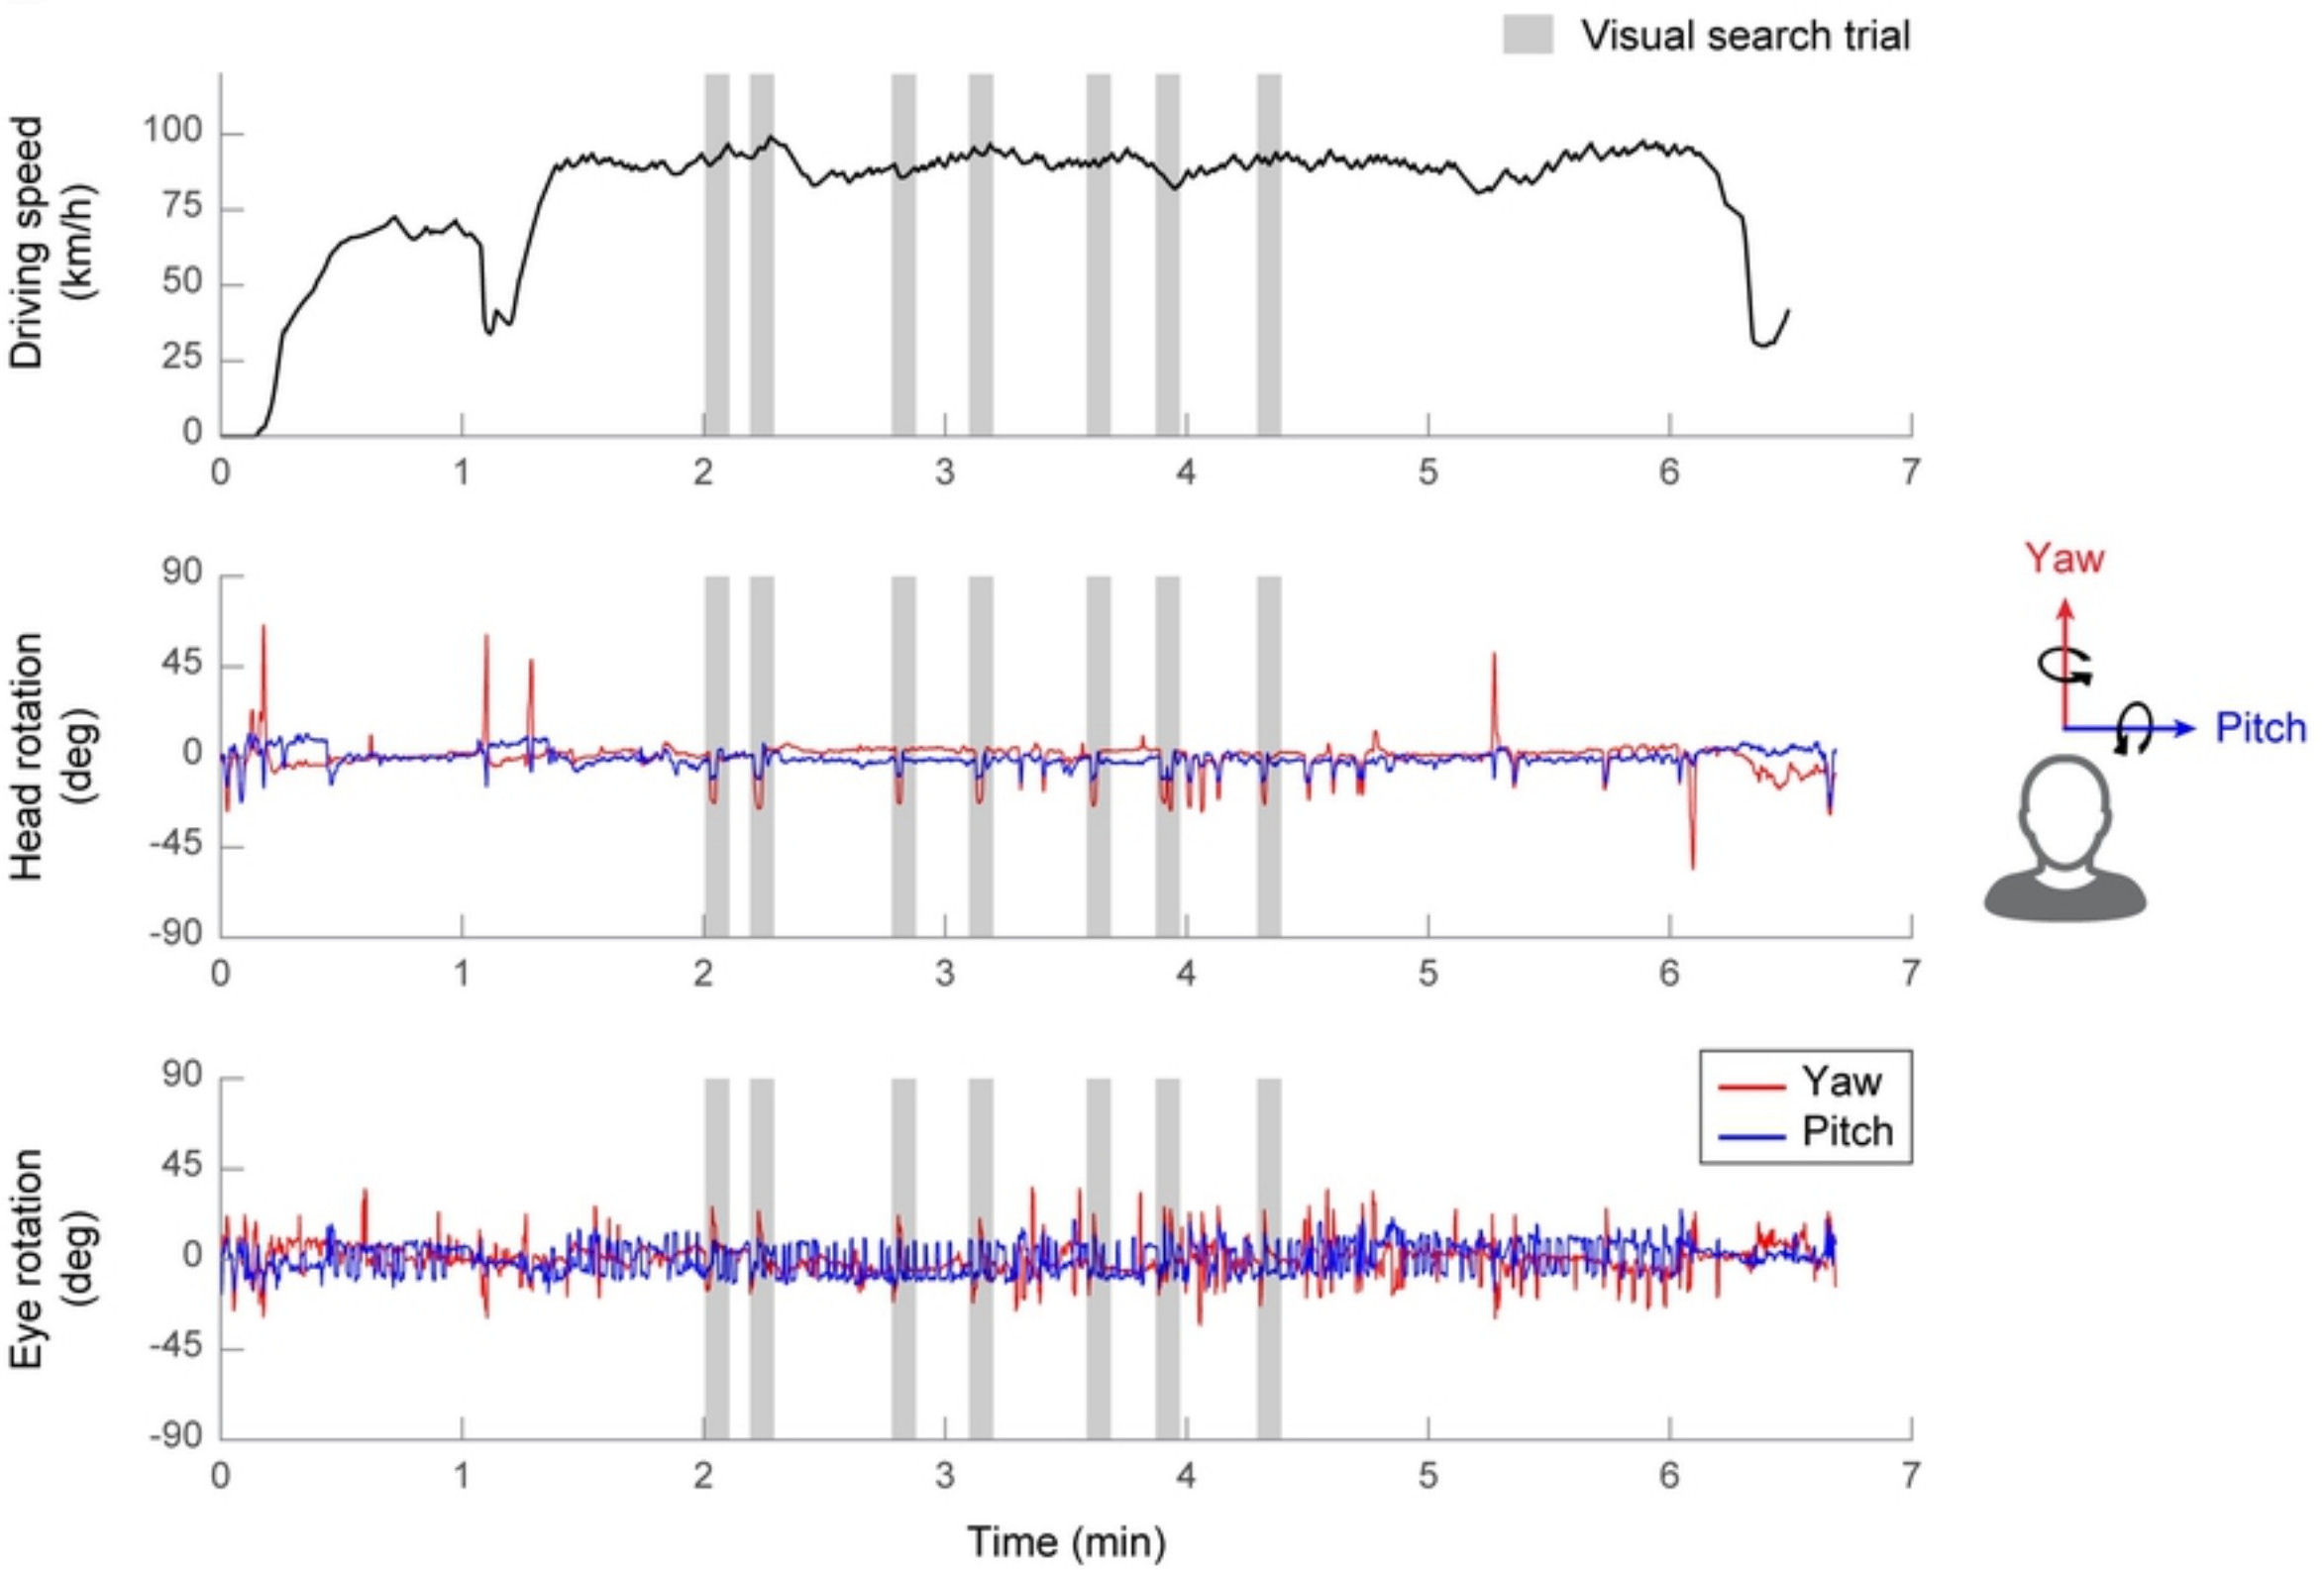

Figure 1

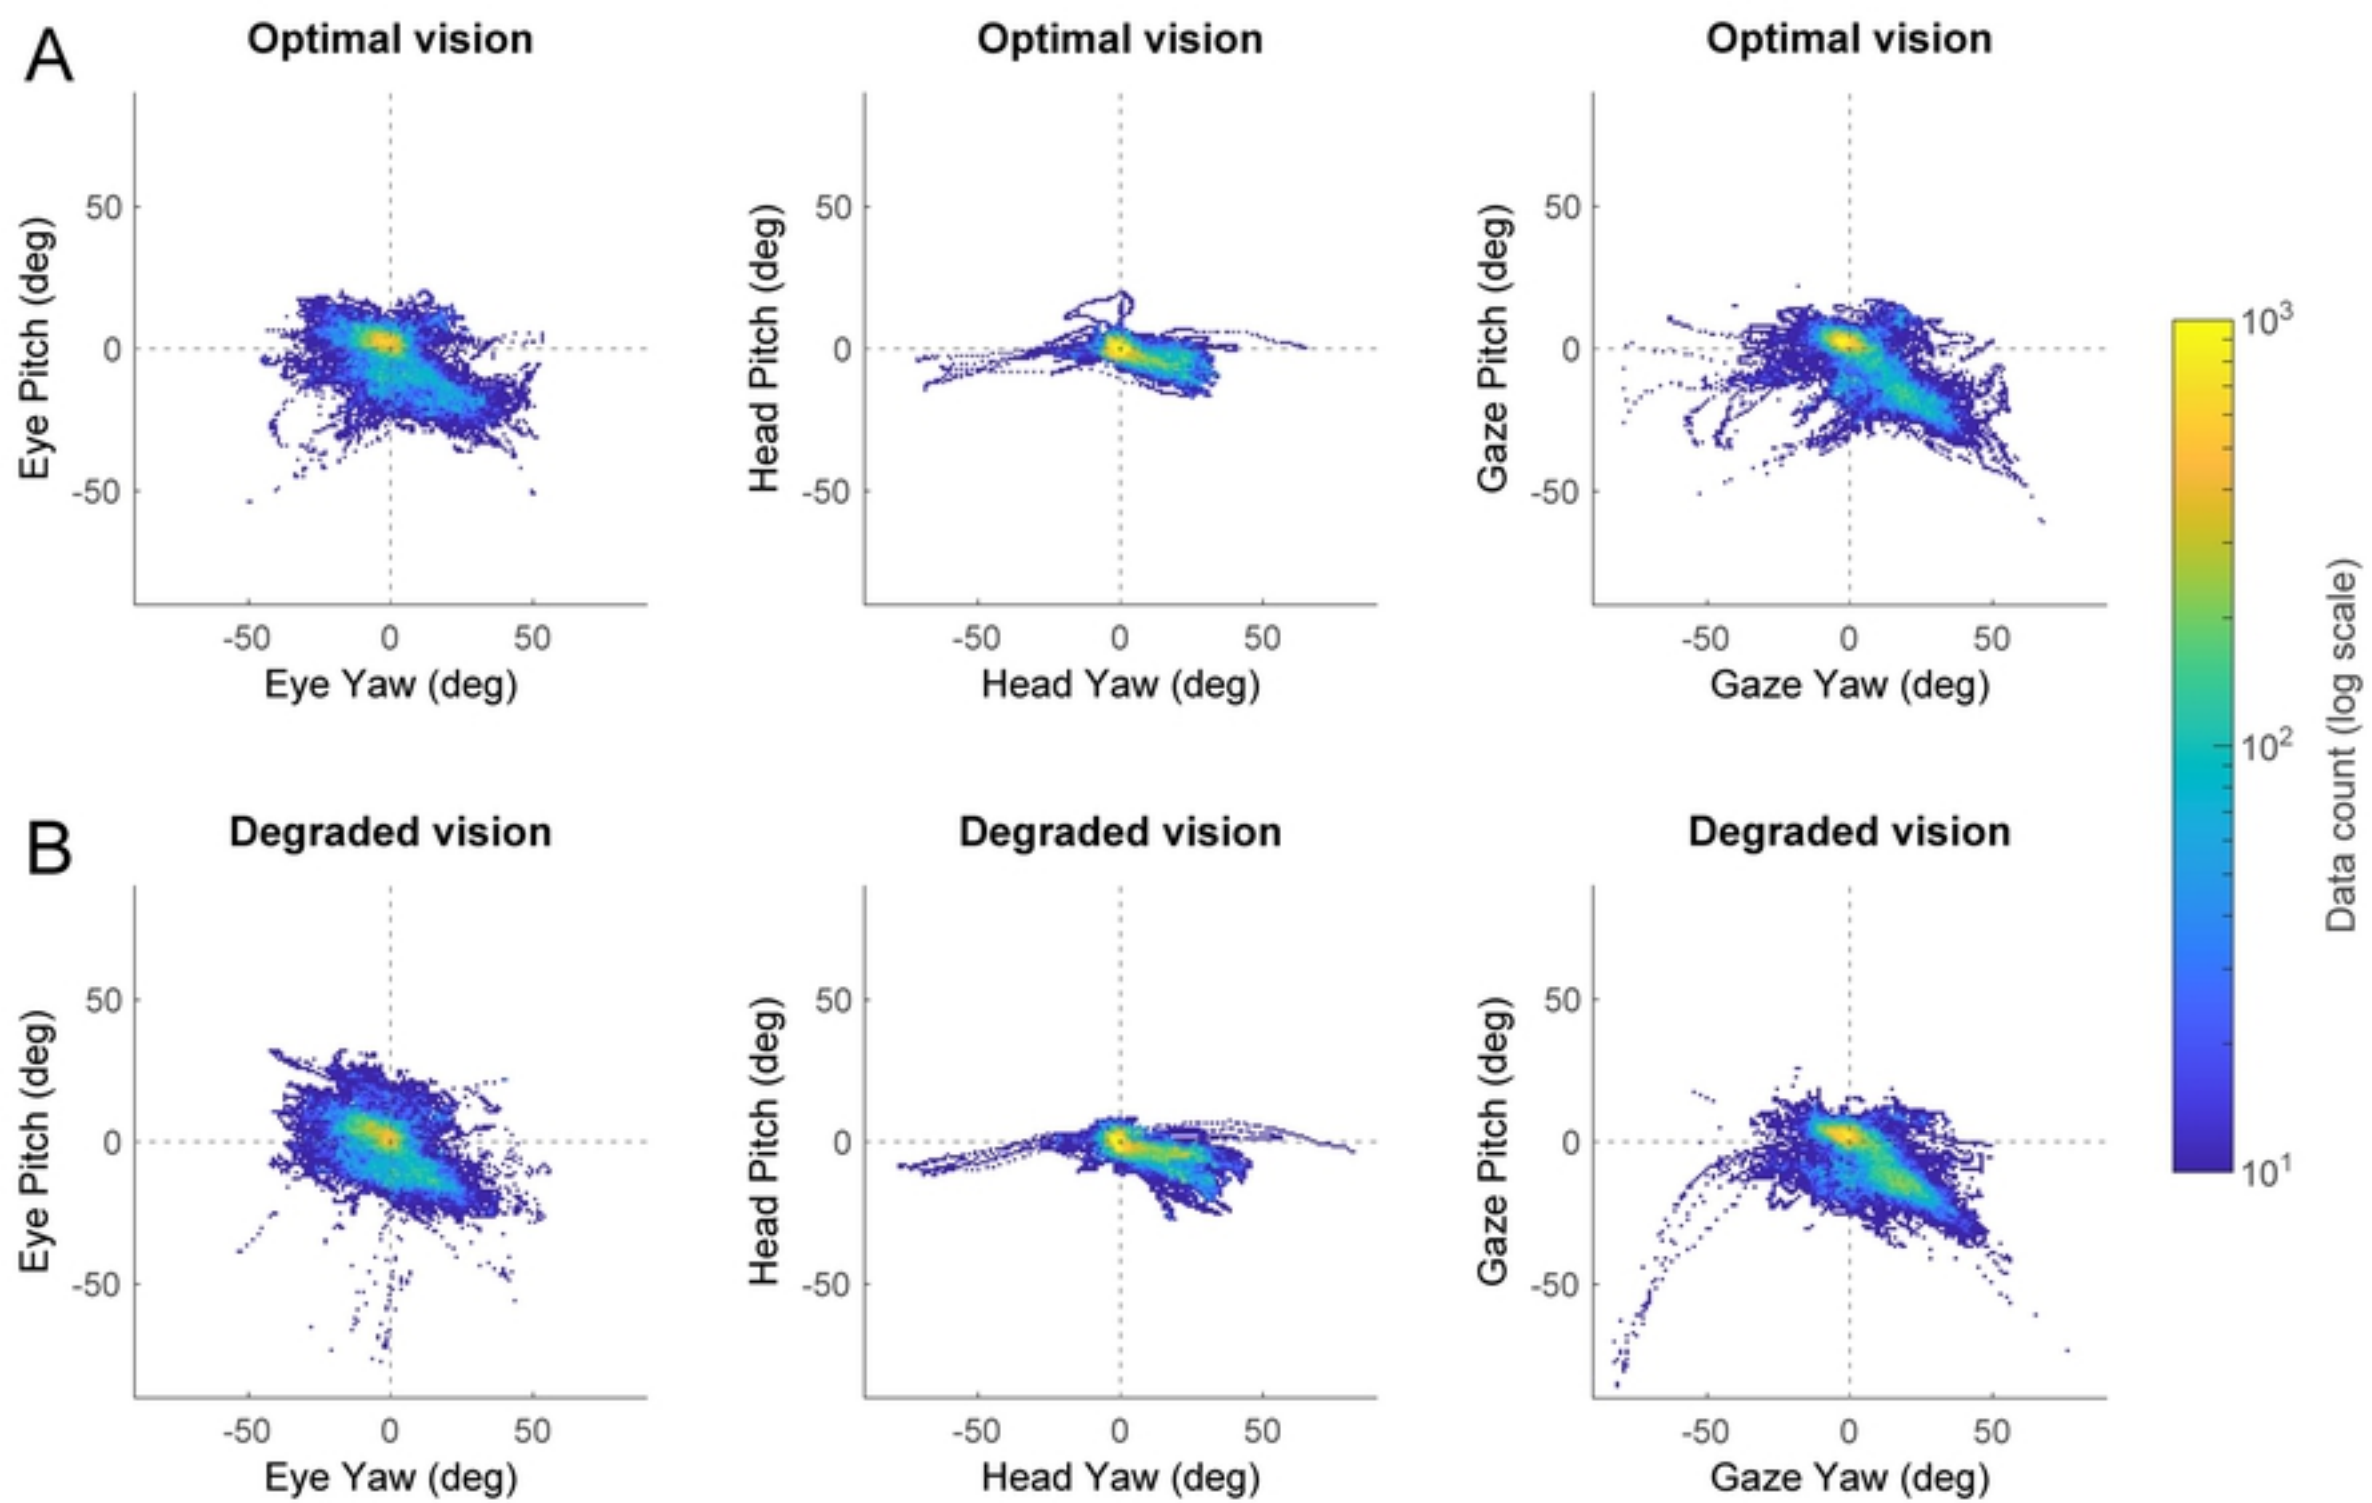

Figure 2

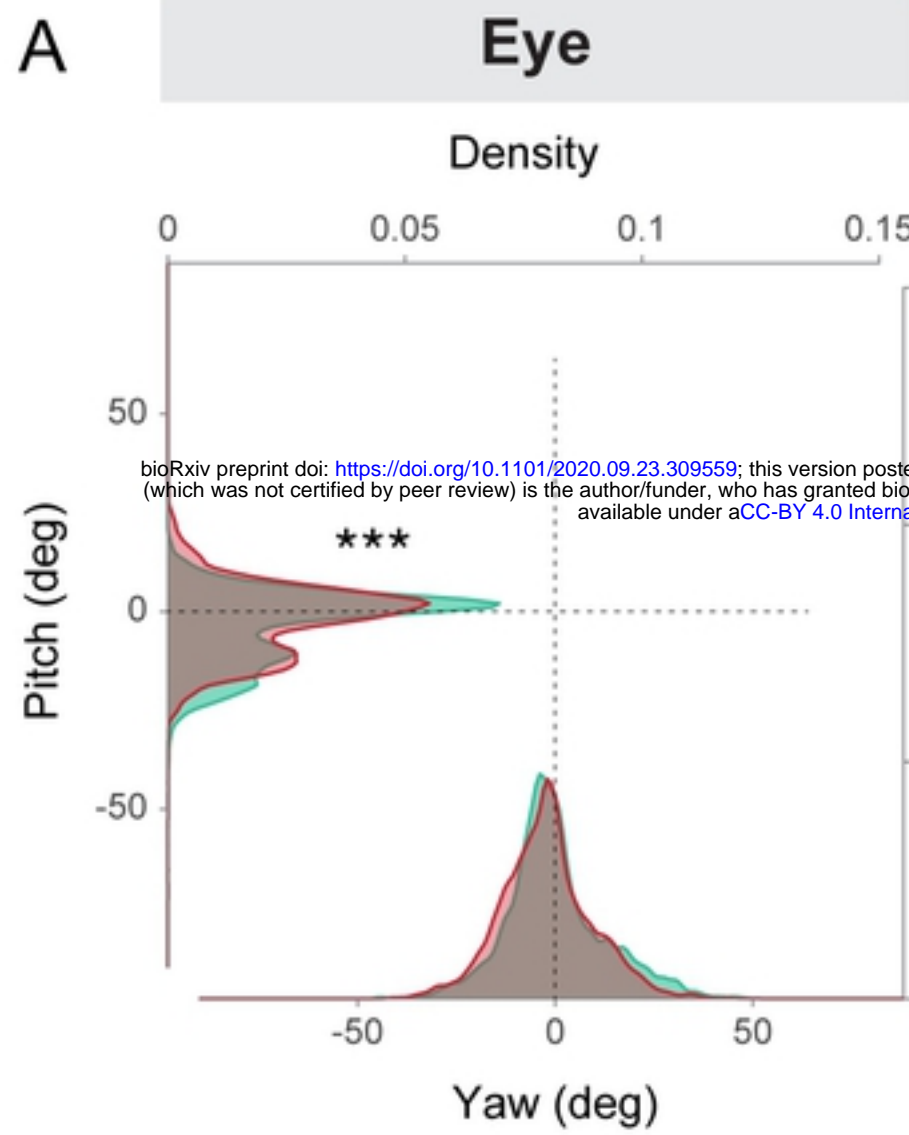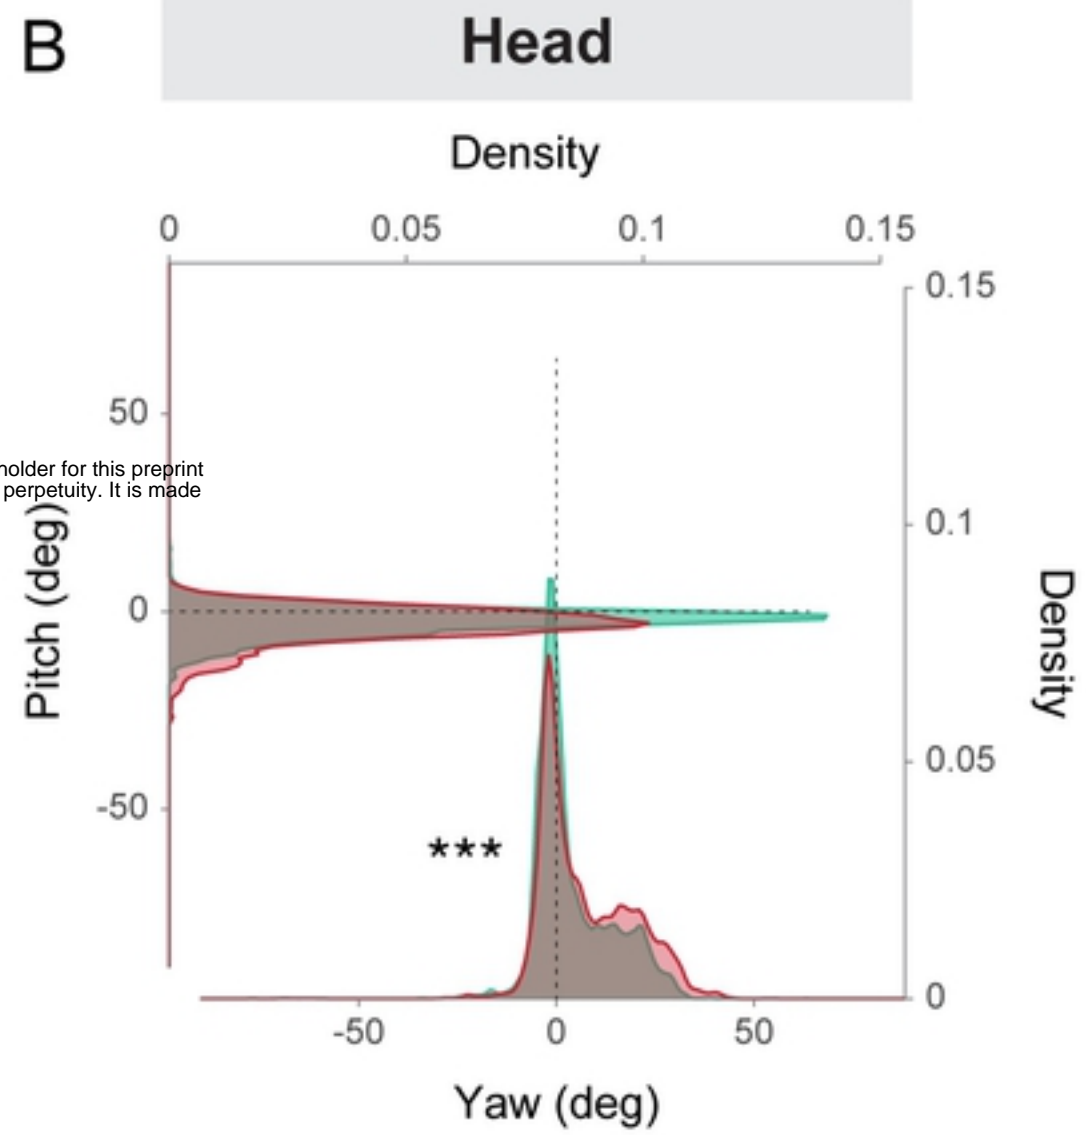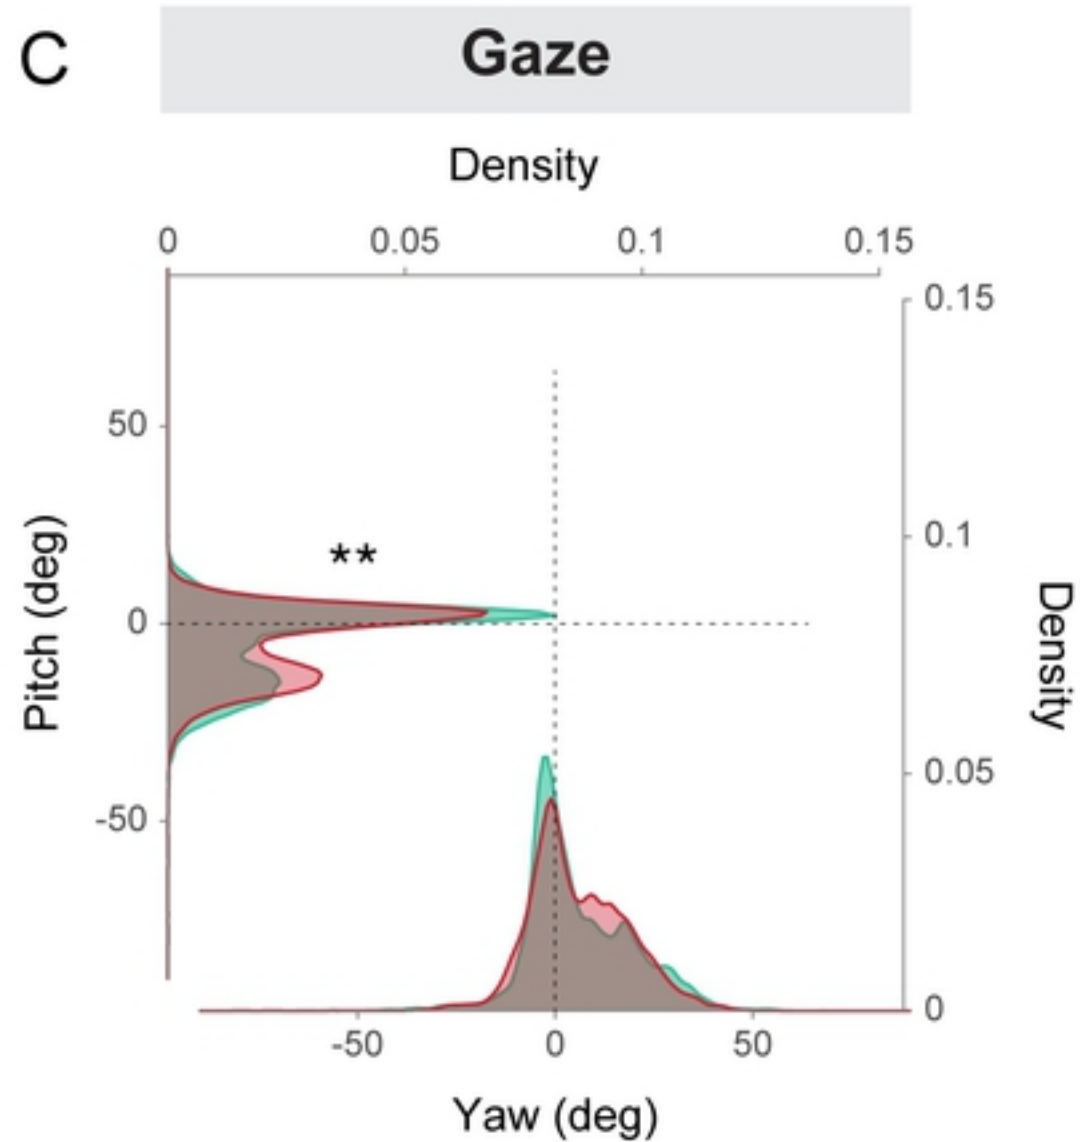

Optimal vision

Degraded vision

Figure 3



# Optimal vision

# Degraded vision

Lower degradation

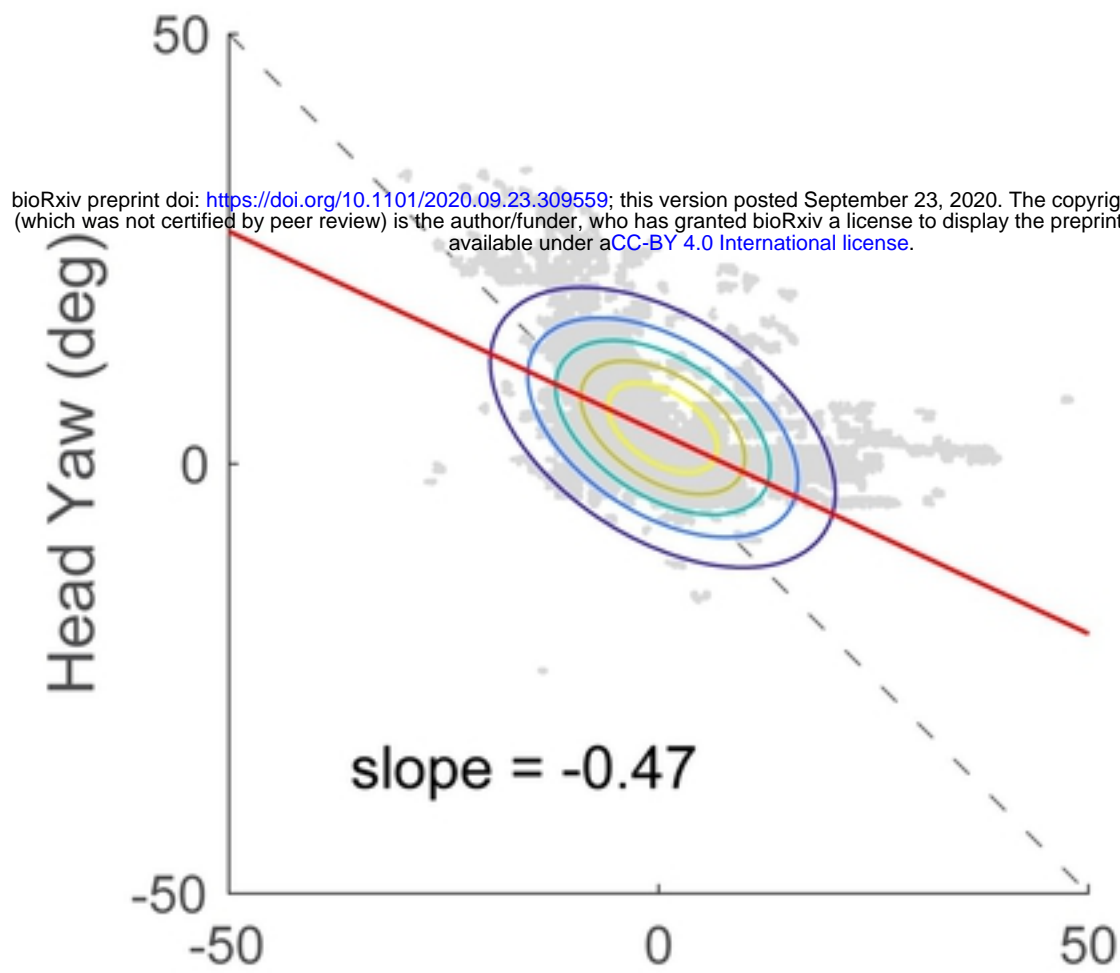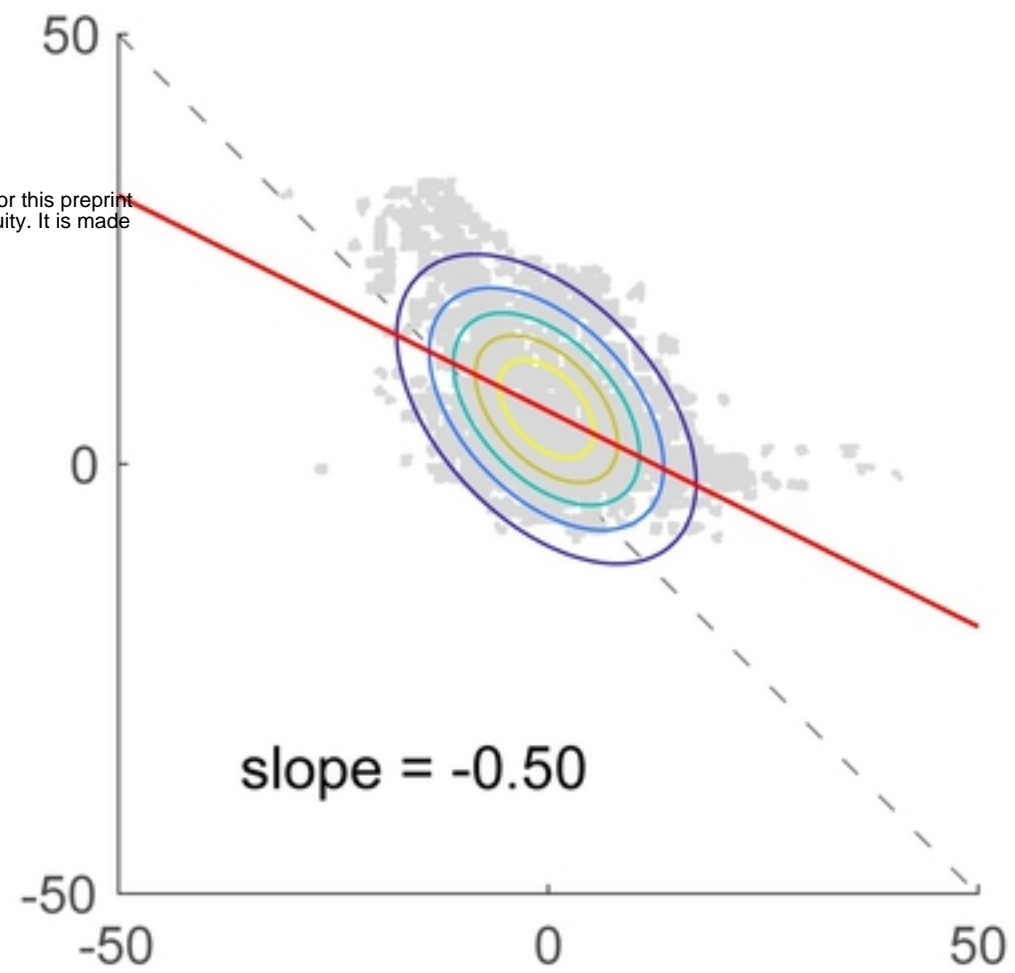

Higher degradation

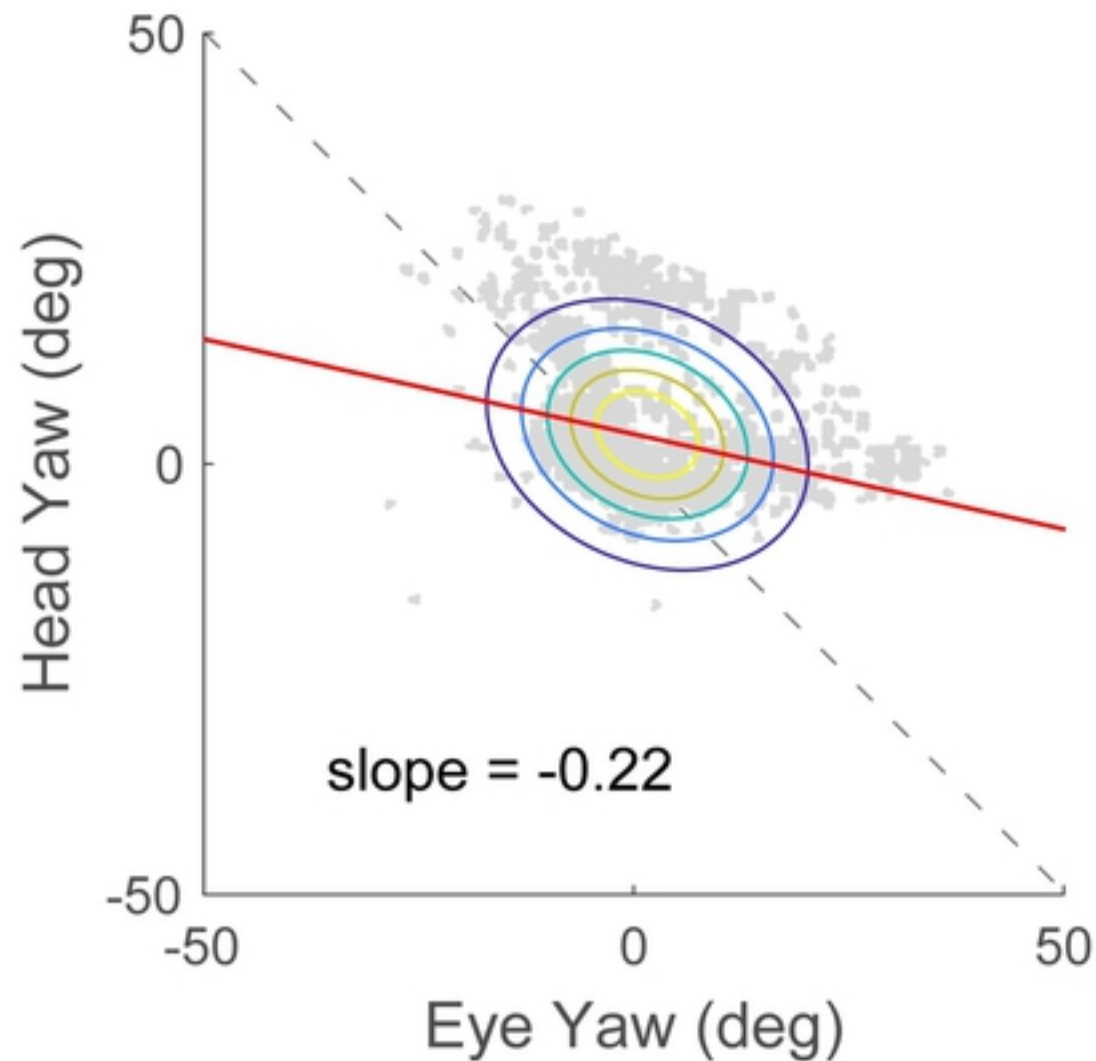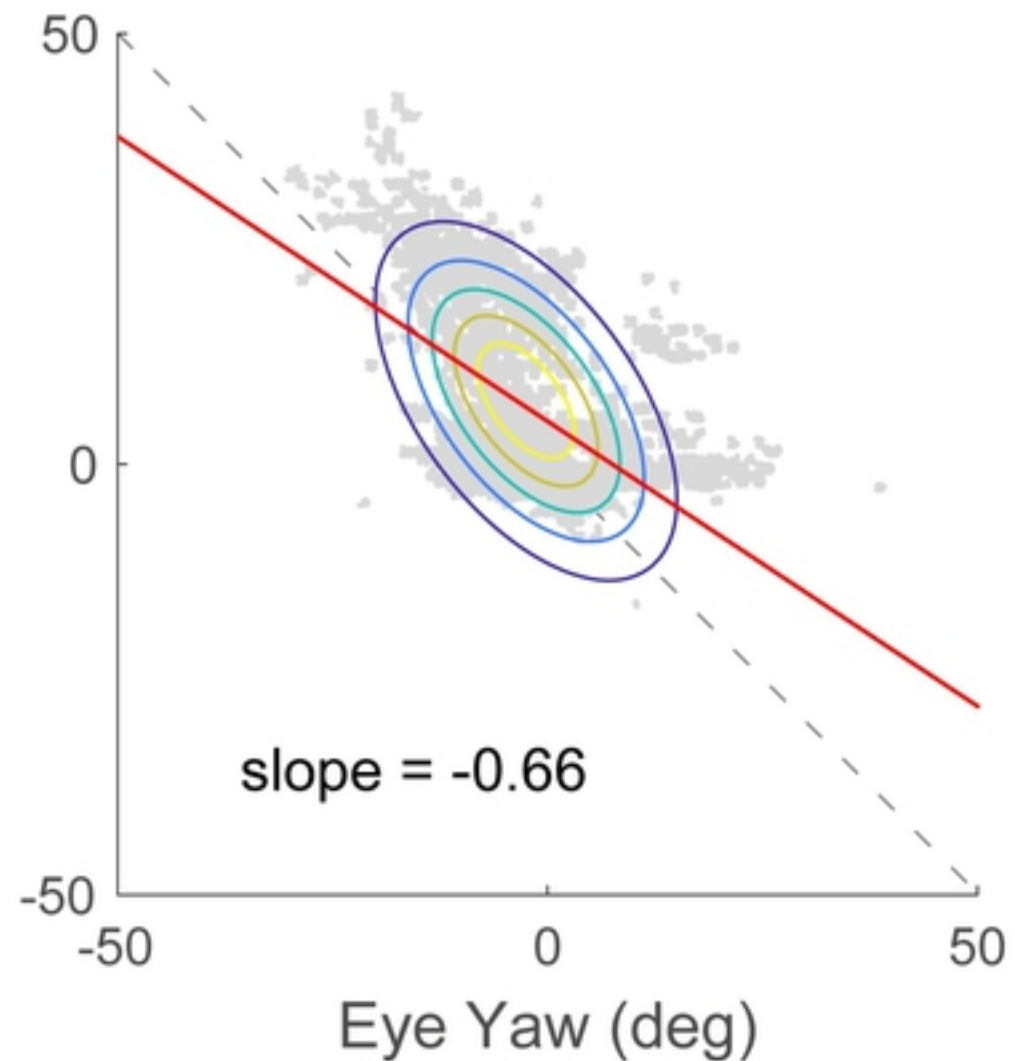

Figure 4



# Optimal vision

# Degraded vision

bioRxiv preprint doi: <https://doi.org/10.1101/2020.09.23.309559>; this version posted September 23, 2020. The copyright holder for this preprint (which was not certified by peer review) is the author/funder, who has granted bioRxiv a license to display the preprint in perpetuity. It is made available under aCC-BY 4.0 International license.

Lower degradation

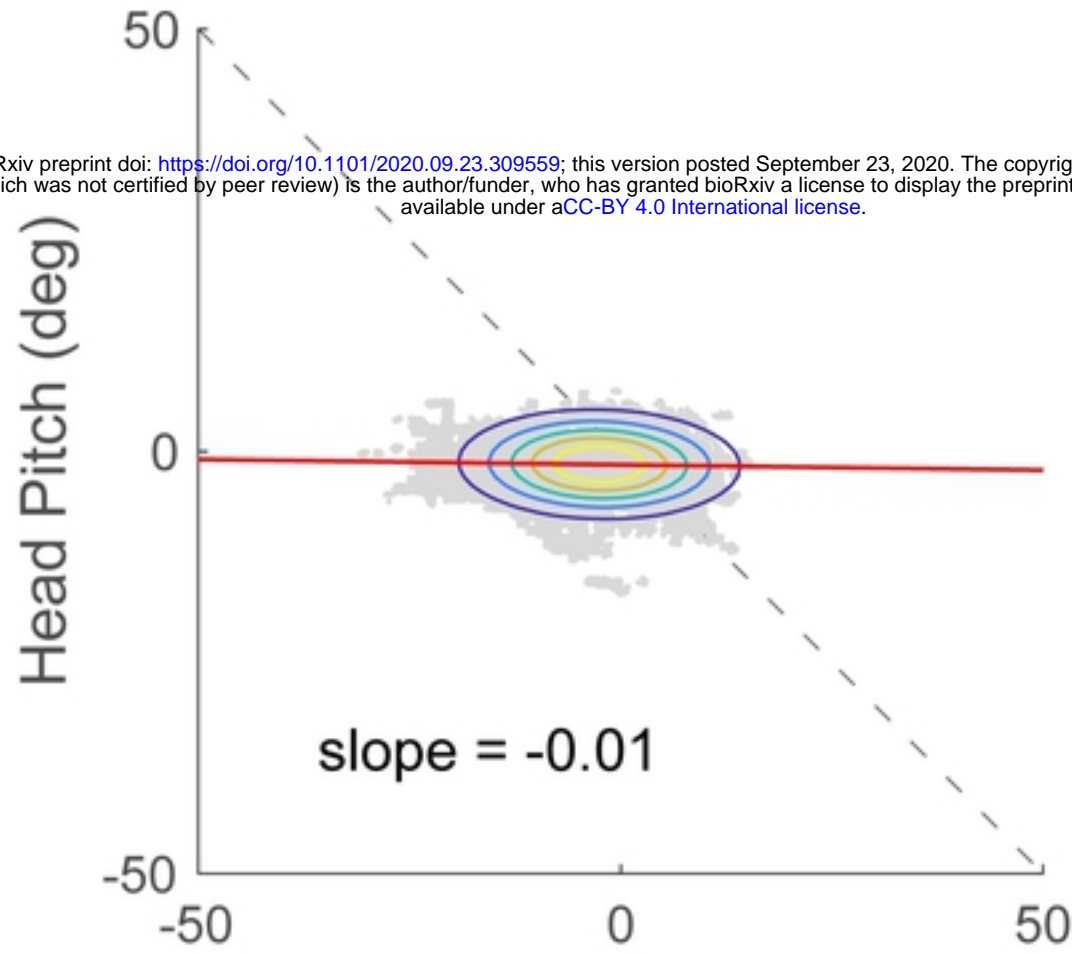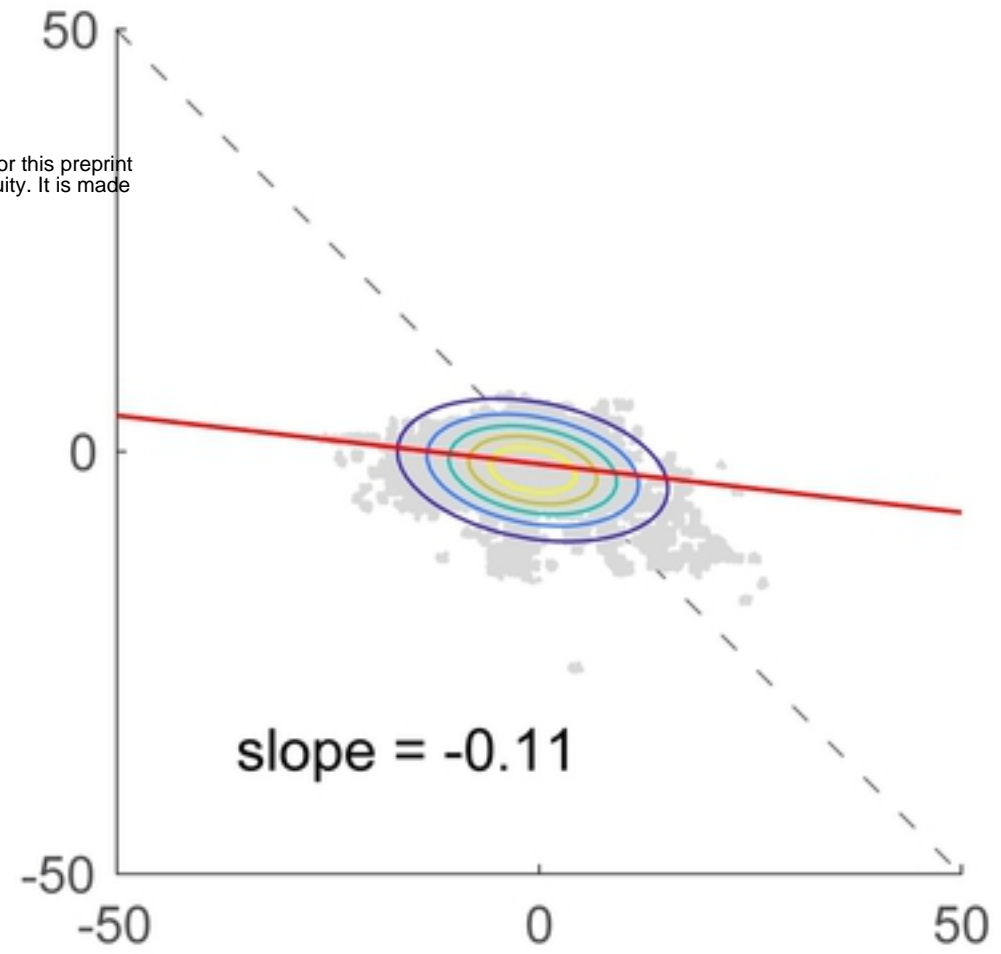

Higher degradation

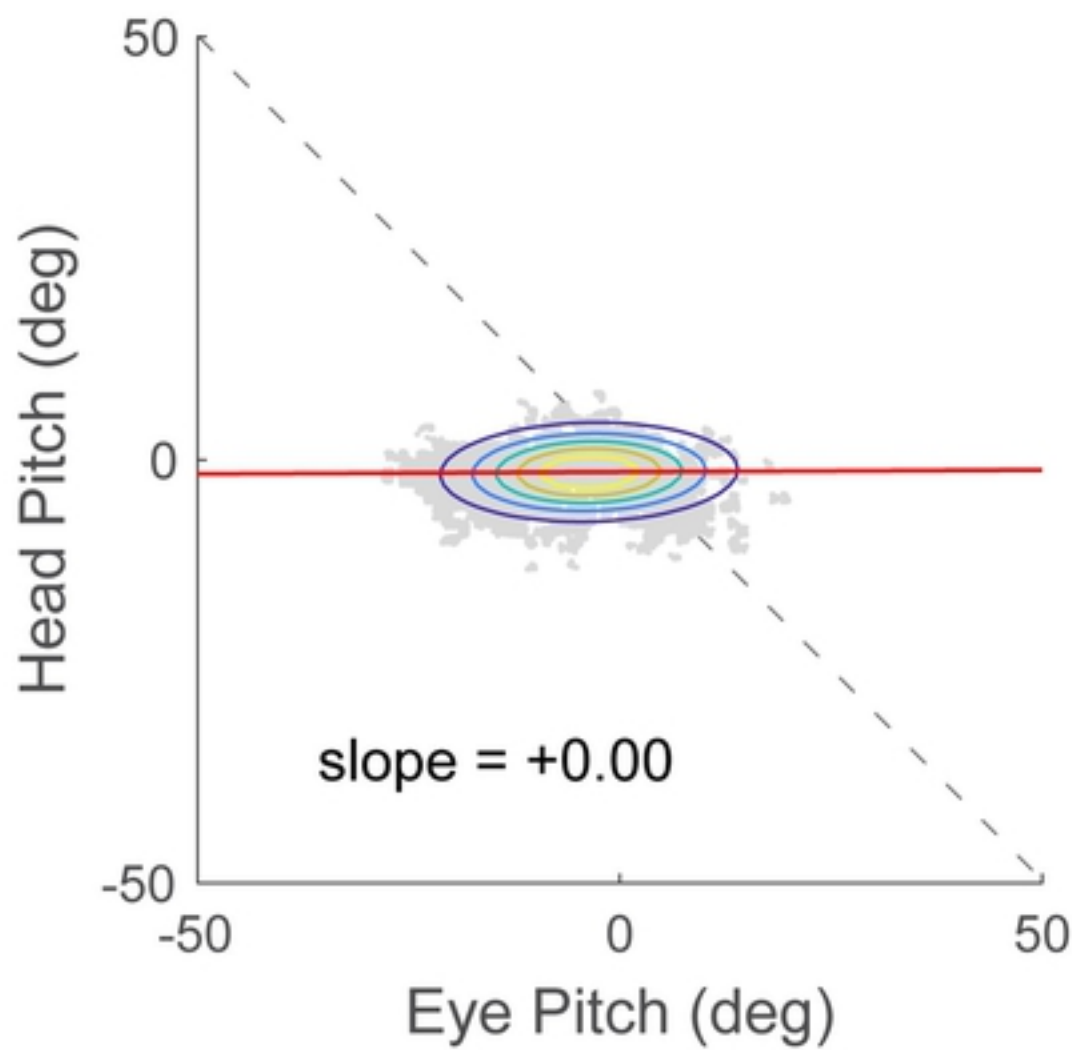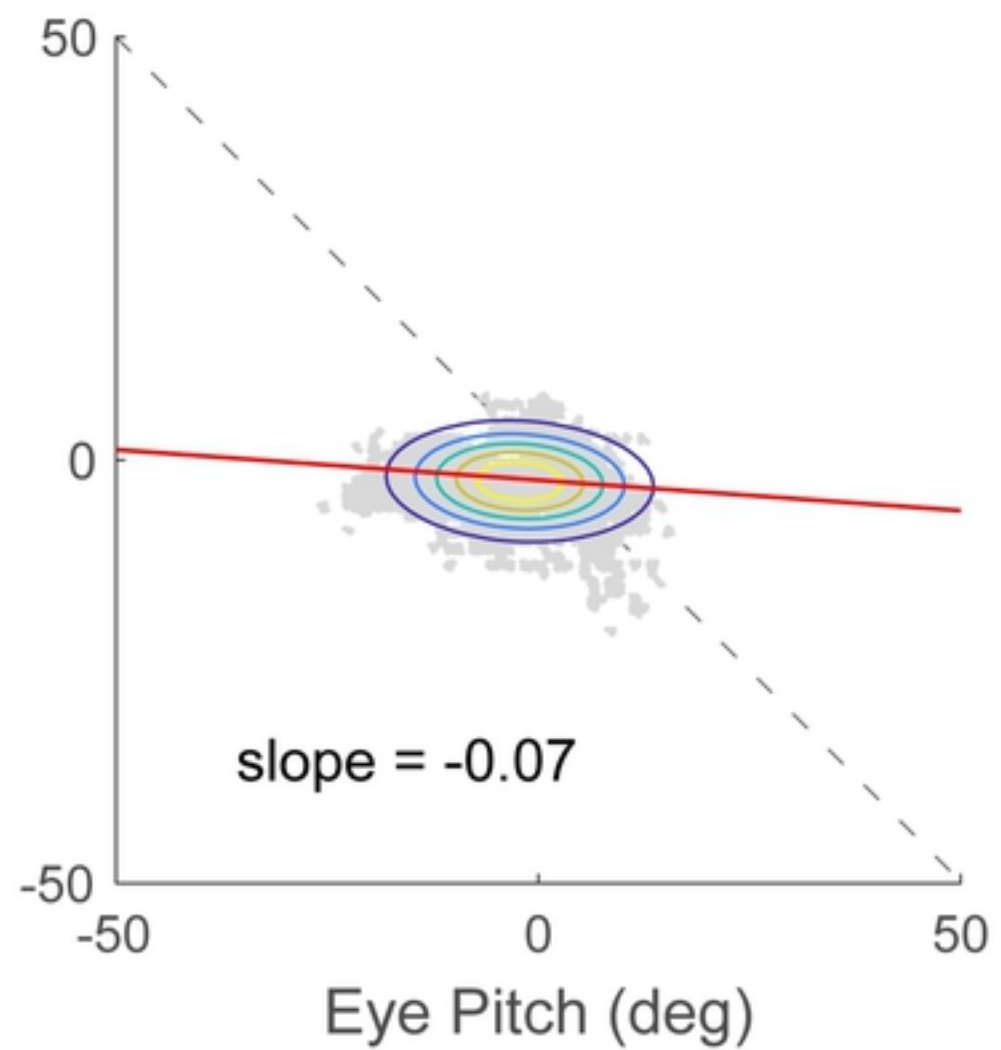

Figure 5

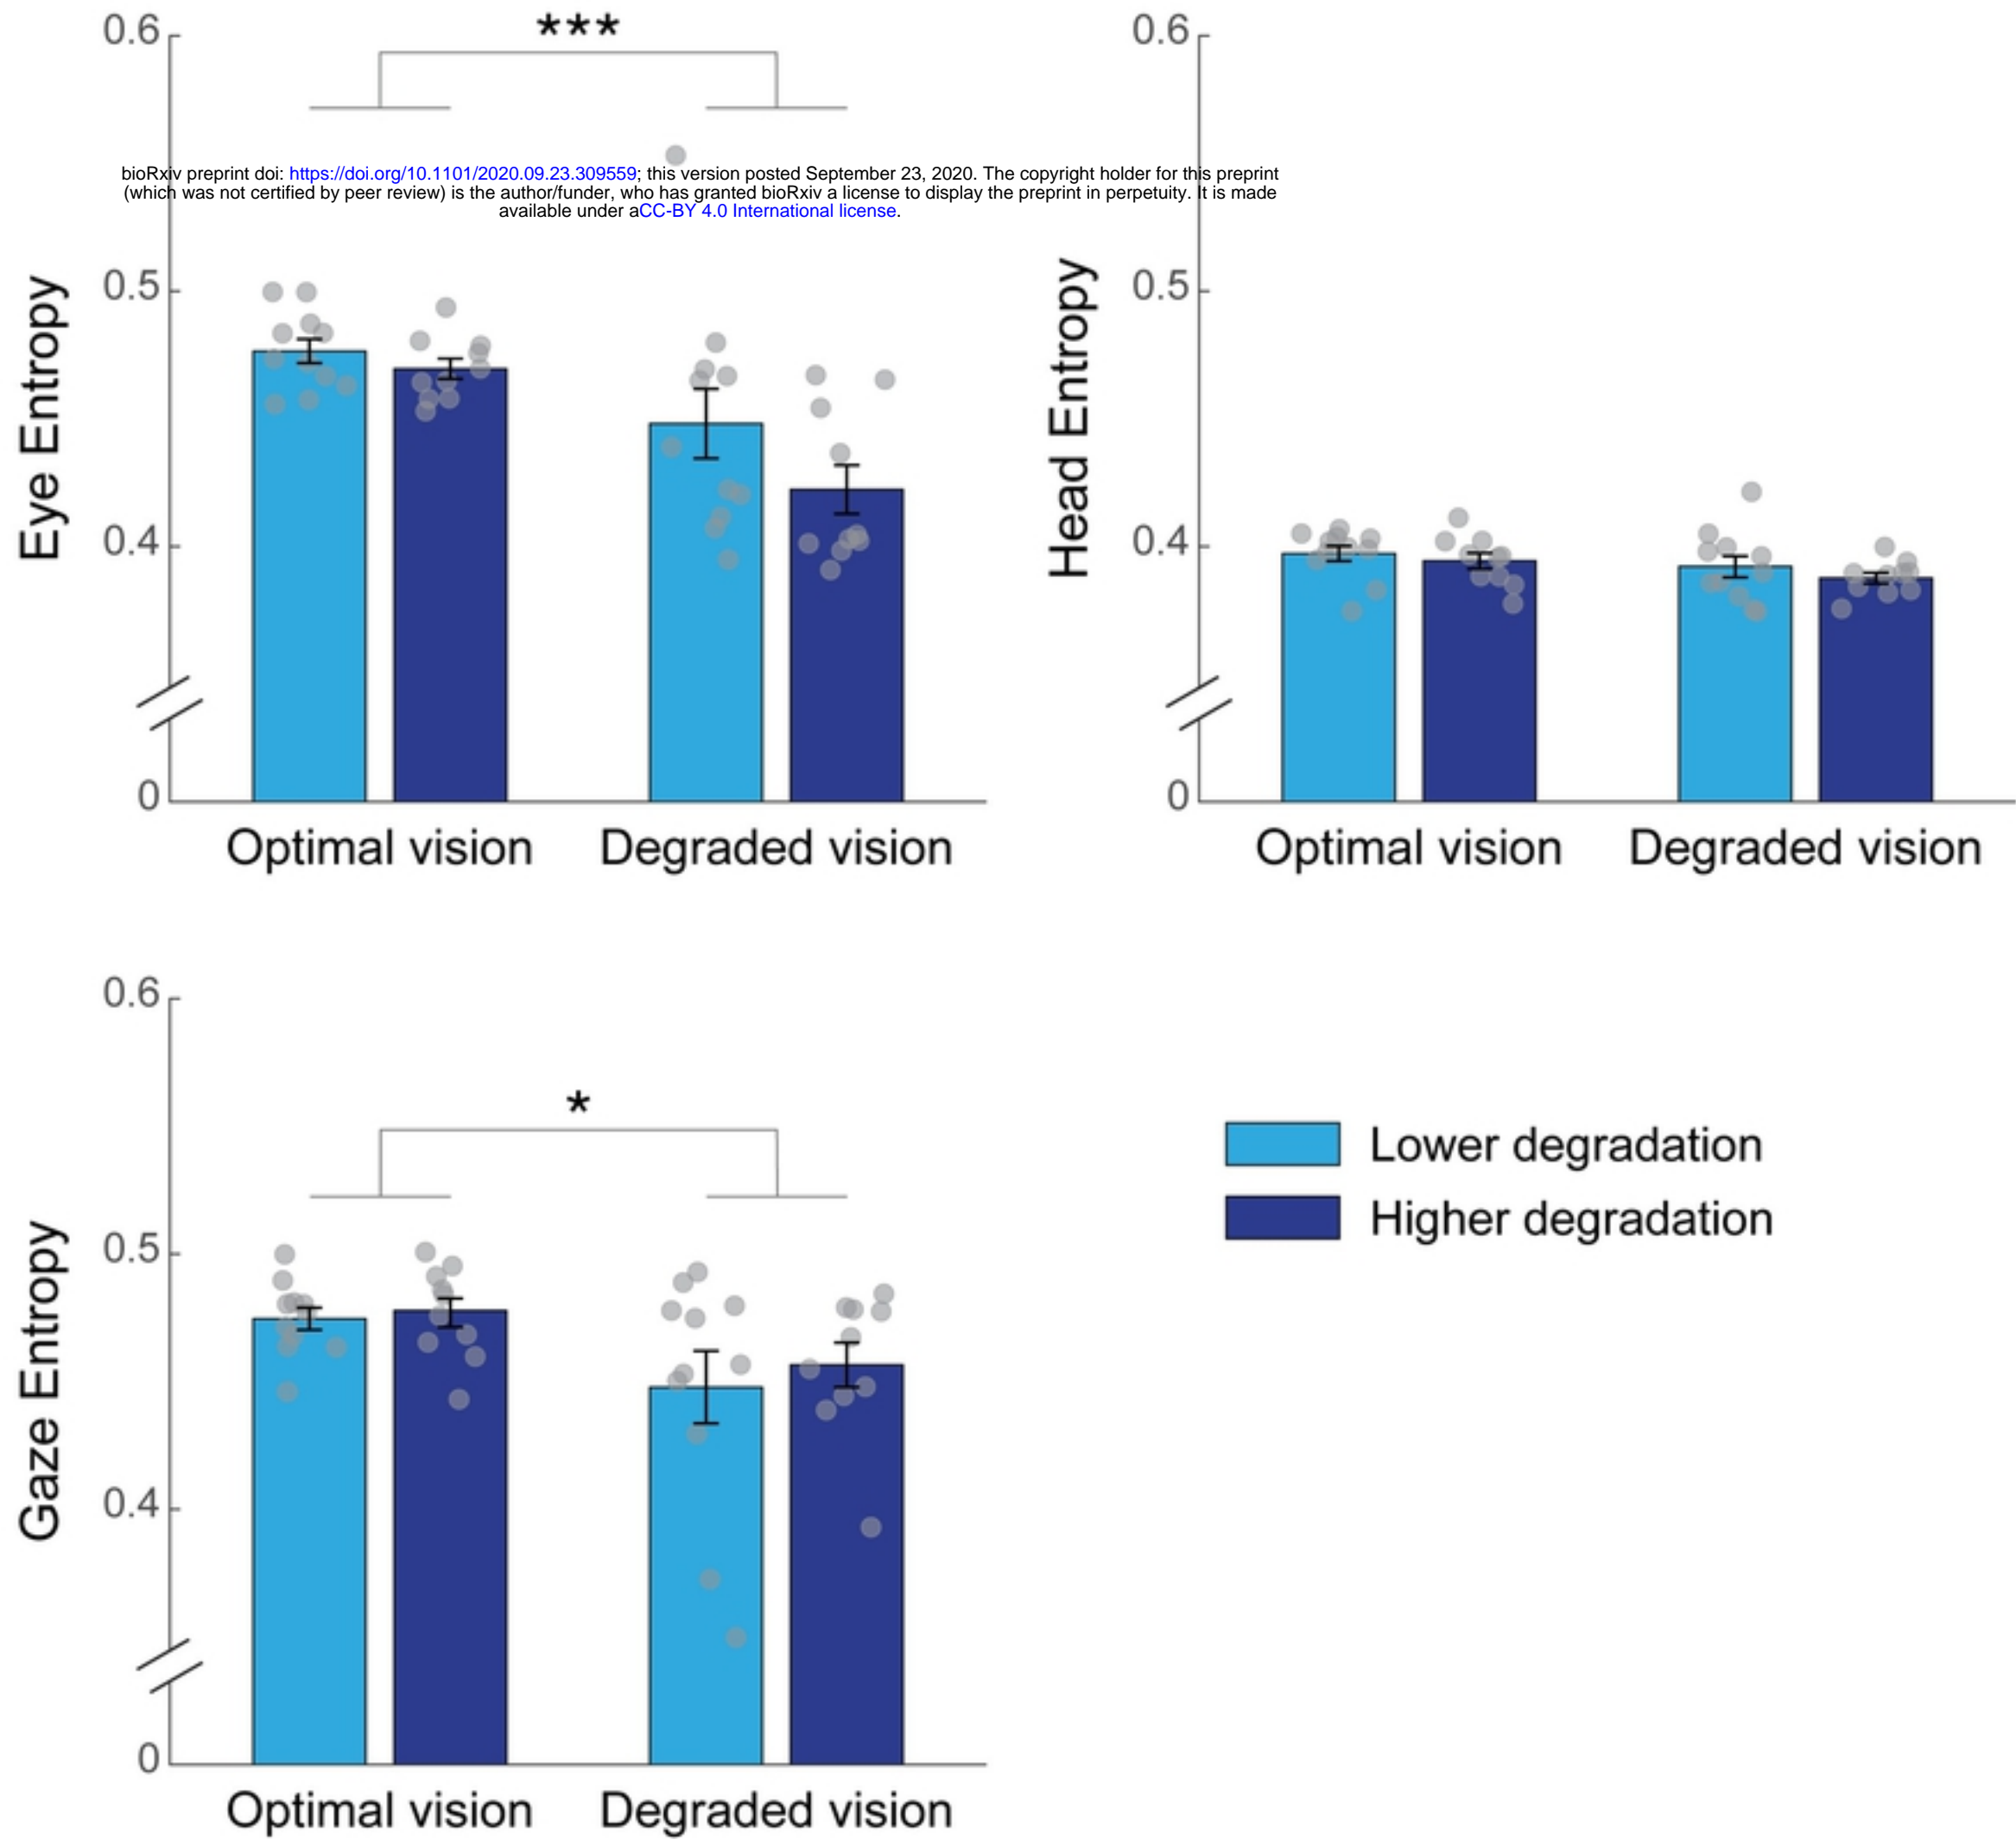

Figure 6
